# 1 **Spatiotemporal mapping of immune and stem cell** 2 **dysregulation after volumetric muscle loss**

3 Jacqueline A. Larouche<sup>1,2</sup>, Emily C. Wallace<sup>1</sup>, Bonnie D. Spence<sup>3</sup>, Scott A. Johnson<sup>4,5,6</sup>,  
4 Mangesh Kulkarni<sup>4,6</sup>, Eric Buras<sup>2,7</sup>, Bryan N. Brown<sup>4,6</sup>, Stephen F. Badylak<sup>4,5,6</sup>, Carlos A.  
5 Aguilar<sup>1,2,8,\*</sup>  
6

7 <sup>1</sup>Dept. of Biomedical Engineering, University of Michigan, Ann Arbor, MI 48109, USA.  
8 <sup>2</sup>Biointerfaces Institute, University of Michigan, Ann Arbor, MI 48109, USA. <sup>3</sup>Dept. of  
9 Molecular, Cellular and Developmental Biology, University of Michigan, Ann Arbor, MI  
10 48109, USA. <sup>4</sup>McGowan Institute for Regenerative Medicine, University of Pittsburgh,  
11 Pittsburgh, PA 15219, USA. <sup>5</sup>Department of Surgery, School of Medicine, University of  
12 Pittsburgh, University of Pittsburgh Medical Center Presbyterian Hospital, Pittsburgh, PA  
13 15213, USA. <sup>6</sup>Department of Bioengineering, University of Pittsburgh, Pittsburgh, PA,  
14 15261, USA. <sup>7</sup>Division of Metabolism, Endocrinology and Diabetes, Department of  
15 Internal Medicine, University of Michigan, Ann Arbor, MI 48109, USA <sup>8</sup>Program in Cellular  
16 and Molecular Biology, University of Michigan, Ann Arbor, MI 48109, USA. \*To whom  
17 correspondence should be addressed: [caguilar@umich.edu](mailto:caguilar@umich.edu).

18

## 19 **ABSTRACT**

20 Volumetric muscle loss (VML) is an acute trauma that results in persistent inflammation,  
21 supplantation of muscle tissue with fibrotic scarring, and decreased muscle function. The  
22 cell types, nature of cellular communication and tissue locations that drive the aberrant  
23 VML response have remained elusive. Herein, we used spatial transcriptomics integrated  
24 with single-cell RNA sequencing on mouse and canine models administered VML. We  
25 observed VML engenders a unique spatial pro-fibrotic pattern driven by crosstalk between  
26 macrophages and fibro-adipogenic progenitors that was conserved between murine and  
27 canine models albeit with varying kinetics. This program was observed to restrict muscle  
28 stem cell mediated repair and targeting this circuit in a murine model resulted in increased  
29 regeneration and reductions in inflammation and fibrosis. Collectively, these results  
30 enhance our understanding of the immune cell-progenitor cell-stem cell crosstalk that  
31 drives regenerative dysfunction and provides further insight into possible avenues for  
32 fibrotic therapy exploration.

## 1 BACKGROUND

2 Severe extremity trauma resulting in volumetric muscle loss (VML) incites reductions in  
3 muscle function, and quality of life<sup>1,2</sup>. The range and nature of VML injuries as well as  
4 alterations in structural and metabolic demands have obfuscated surgical repair schemas  
5 and regenerative therapies<sup>3,4</sup>. Currently, the cellular and molecular factors that drive the  
6 pathological VML response and prevent healing remain poorly understood. The frank loss  
7 of tissue after VML manifests in immune cell infiltration that lasts for days to months<sup>5,6</sup>  
8 and is accompanied by fibrotic scarring<sup>7,8</sup>, which is in contrast with skeletal muscle injury  
9 that results in regeneration<sup>9–11</sup>. Previous studies have demonstrated increases in  
10 infiltration and accrual of neutrophils<sup>9</sup>, macrophages (mφs)<sup>6,8,12,13</sup>, and T<sub>helper</sub> 2<sup>14</sup> cells in  
11 VML injury and the adverse effects of the sustained inflammation from these cells range  
12 from exacerbated tissue damage to prevention of muscle stem cell mediated repair. As  
13 such, quantitative mapping of immune and stem/progenitor cell dysfunction after VML and  
14 how intercellular communication is spatially modified to inhibit regeneration is needed to  
15 maximize tissue repair schemas.

16 Spatial transcriptomics is a novel technology that generates unbiased RNA sequencing  
17 (RNA-seq) datasets in a spatially registered manner via capture of transcripts on  
18 barcoded beads that are decorated with DNA capture probes and tethered to specific  
19 locations on a glass slide<sup>15</sup>. This technique is amenable to integrate with histological  
20 imaging, rendering coupled insights into pathological mechanisms of expression changes  
21 with spatial context. Recent application of spatial transcriptomics during skin tissue  
22 repair<sup>16</sup> has revealed critical aspects of how injury-responsive cells are recruited to the  
23 wound, alter their state and signal with other cell types. Yet, exploration of spatial  
24 transcriptomics in the pathological microenvironment of VML injured muscle and  
25 elucidating regional variations of immune cell and progenitor functions after VML has not  
26 been performed.

27 Herein, we profiled VML defects using spatial transcriptomics (spGEX) integrated with  
28 single cell RNA-Sequencing (scRNA-Seq) datasets to understand the spatial context  
29 underlying the development and progression of muscle fibrosis. We observed and  
30 validated an abundance of mφs localized to the defect zone, mesenchymal derived cells  
31 (MDCs) predominantly occupying the transition and defect zones, and myogenic cells  
32 primarily localized in the transition zone with negligible infiltration into the defect zone.  
33 Cell communication analysis revealed MDCs as key drivers of pro-fibrotic signaling,  
34 mediating trophic communication between mφs and MuSCs as well as through directly  
35 signaling to the mφs and MuSCs. Interestingly, time-course spGEX profiling of VML-  
36 induced fibrosis in a large animal model revealed co-localization of MDC and myogenic  
37 transcripts at an earlier timepoint, which were supplanted by a fibrotic and inflammatory  
38 transcriptional landscape by the later timepoint, suggesting conservation of responses  
39 across species albeit with different kinetics. Finally, we inhibited pro-fibrotic signaling  
40 using a small molecule inhibitor of transforming growth factor beta receptor 2 (TGFB2)  
41 and observed increased infiltration of MuSCs into the defect zone along with reduced  
42 inflammatory and fibrotic signaling transcripts across both the defect and transition zones.  
43 Together, this work provides a resource for further understanding cell-cell communication  
44 networks that contribute to fibrotic degeneration in a spatial context.

## 1 RESULTS

### 2 *Spatial transcriptomics of regenerative response to murine volumetric muscle loss injury* 3 *reveals cellular and molecular pathology*

4 To understand the fibrotic response that develops after VML, we administered 2mm  
5 full-thickness punch biopsies to the tibialis anterior (TA) muscles of young adult mice.  
6 Consistent with previous results<sup>9</sup>, we observed increased fibrosis by staining with  
7 picosirius red at 7- and 28- days post injury (dpi) (Supp. Figure 1A). To decipher the  
8 mechanisms that confer this fibrotic behavior, we extracted cryosections of VML-injured  
9 murine tissues from 7-dpi, stained for hematoxylin and eosin (H&E) and annotated the  
10 tissue into zones of (1) complete muscle loss (defect zone), (2) remaining in-tact muscle  
11 (intact zone) and (3) a transition zone that partitions the lost muscle from the remaining  
12 musculature. The defect zone was characterized by an abundance of mononucleated  
13 cells consistent with previous observations of inflammation<sup>9</sup>, while the intact zone  
14 contained muscle fibers with peripherally located nuclei. The transition zone was  
15 characterized by both mononucleated cells, and myofibers with centrally located nuclei  
16 indicating active regeneration or degeneration. To glean insights into the complex  
17 signaling milieu in the defect and transition zones, we generated replicate spatial  
18 transcriptomic maps on VML injured tissues at 7 days' post injury using the 10x Genomics  
19 Visium for spGEX analysis (Figure 1A-B). We generated 247,976,765 sequencing reads,  
20 mapped the demultiplexed reads to their corresponding spatial location and observed  
21 2,939 location-specific barcodes with a median of about 13,000 unique molecular  
22 identifiers (UMIs) and 3,500 unique genes per spot (Supplemental Table 1). Reads  
23 derived from the defect zone displayed more UMIs than the other two zones, which is  
24 consistent with the increased number of cells in these locations (Figures 1B-C). We  
25 performed gene set enrichment analysis on each zone and observed enrichments in gene  
26 sets associated with the immune system, stress, and defense in the defect zone, muscle  
27 structure development in the transition zone, and various metabolism gene sets in the  
28 intact muscle zone (Figure 1D). Towards this extent, inflammatory (*Ctss*, *S100a8*,  
29 *S100a9*) and collagen genes were enriched in the defect zone (*Col1a1*, *Col1a2*), whereas  
30 developmental myogenic genes (*Tnnt1*, *Tnnt2*, *Myh3*, *Myh8*) were upregulated in the  
31 transition zone, and metabolism genes (*Cox6a2*, *Cox8b*) and genes associated with  
32 mature muscle fibers (*Myh4*) were upregulated in the intact zone (Supp. Fig. 1B). These  
33 results demonstrate spatial patterning in gene expression following VML injury is  
34 consistent with tissue morphology indicating an area of inflammation, a region of  
35 regeneration, and a region that is morphologically intact, but exhibits altered metabolism  
36 in response to the defect.

37 A current limitation of spGEX is the low resolution of spatially barcoded spots, which  
38 contain reads from up to ten proximal cells<sup>17</sup>. To probe cell localization within our spatial  
39 datasets, we used Seurat to integrate our spGEX data with scRNA-seq datasets of VML  
40 defects isolated at 7 days post injury that we previously generated<sup>9,18</sup>. This analysis  
41 revealed regional localization of cell types consistent with GO Term enrichment analysis  
42 and differential gene expression analysis (Figure 1E, n=4 tissues from 4 mice, two-  
43 sample, two-sided t-test). For example, the defect zone was predicted to be  
44 predominantly occupied by macrophages (møs) and mesenchymal derived cells (MDCs),  
45 consistent with the localization of genes such as *Cd68*, *Ptprc*, *Aspn*, and *Col1a1* (Supp.

1 Fig. 2A-B). The transition zone was primarily occupied by muscle stem cells (MuSCs) and  
2 their progeny, expressing transcripts associated with myogenesis including *Myog* and  
3 *Myh3* (Figure 1E, bottom, and Supp. Fig. 2B). We did not detect expression of MuSC  
4 marker genes in the defect zone, which may indicate cellular signaling that inhibits  
5 migration or regenerative actions of these cells. To confirm these predictions, we  
6 performed immuno-histological staining for CD68<sup>+</sup> møs and observed nearly identical  
7 patterns as our spGEX analysis (Figure 1F, n=4 tissues from 4 mice, one-way ANOVA  
8 with BH post-hoc analysis), whereby the defect zone exhibited enrichments in CD68<sup>+</sup>  
9 møs. To validate MDCs, we utilized a lineage-tracing system for PDGFRa<sup>+</sup> cells  
10 (PDGFRa<sup>EGFP</sup>), administered VML defects as above, isolated cross-sections at 7-dpi and  
11 performed immunostaining for PDGFRa<sup>+</sup> møs. Similar to our observations with møs, we  
12 detected localized enrichment of eGFP/PDGFRa cells in the defect and transition zones  
13 (Figure 1F, n=5 tissues from 5 mice, one-way ANOVA with BH post-hoc analysis). To  
14 verify positioning of MuSCs and their progeny after VML, we employed a lineage tracing  
15 system for Pax7<sup>+</sup> cells (Pax7<sup>CreERT2</sup>-Rosa26<sup>TdTomato</sup>) and generated VML defects as  
16 above. Cross-sectioning and immunostaining for TdTomato at 7-dpi revealed highly  
17 concordant results with our spGEX analysis, whereby MuSCs and their progeny were  
18 enriched in the transition zone and were almost entirely absent from the defect region  
19 (Figure 1F, n=4 tissues from 4 mice, one-way ANOVA with BH post-hoc analysis). These  
20 results suggest that MuSCs are either inhibited from entering the defect zone, or  
21 otherwise are unable to remain.

22 To gain deeper insights into inter-cellular signaling that regulates the regenerative  
23 response, we assessed ligand-receptor interactions between predicted cell types in the  
24 defect and transition zones. Specifically, we subset the møs, MDCs, and MuSCs from the  
25 7-dpi scRNA-Seq reference dataset and performed CellChat<sup>19</sup> interaction analysis. We  
26 observed substantial crosstalk between the three cell-types, and that the majority of the  
27 signaling ligands were expressed by the mesenchymal cells (Figure 2A). Moreover, most  
28 of these signaling ligands are pro-fibrotic, including various thrombospondins (*Thbs1*,  
29 *Thbs2*), collagens and extracellular matrix proteins (*Col1a1*, *Col1a2*, *Col6a1*, *Col6a2*,  
30 *Comp*, *). We also observed various inflammatory ligands and receptors,  
31 predominantly expressed among the macrophages (*Ccr1*, *Ccr2*, *Ccl2*, *Ccl3*, *Ccl6*, *Ccl9*,  
32 *Tnf*, *Tnfrsf1a*, *Tnfrsf1b*). To localize these transcripts within the tissues, we calculated  
33 module scores for the expression of the CellChat-predicted ligands and receptors and  
34 overlaid them onto the H&E images (Figure 2B). This revealed co-localization of the  
35 mRNAs for cell-type specific ligands and receptors in the same regions, confirming that  
36 the spatial proximity and concentration of these genes in the defect and transition zones  
37 supports a pro-fibrotic communication network following VML (Figure 2C, n=4 tissues  
38 from 4 mice, one-way ANOVA with BH post-hoc analysis). Together, these results  
39 suggest that mø and MPC occupancy of the defect region creates a pro-fibrotic milieu  
40 that potentially inhibits MuSC-mediated regeneration.*

41

#### 42 *Canine VML injury exhibits spatial and molecular homology with murine model*

43 To assess whether our observations from the murine VML model are conserved in  
44 a large animal, we administered VML defects to the rectus femoris muscle of female  
45 canines by surgical resection of a large volume of tissue (10 cm length x 4 cm width x 2-

1 3 cm depth, Figure 3A-B). The wound was left open and bandaged followed by periodic  
2 extraction of punch biopsies (6mm) from different locations of the wound (a more central  
3 area labeled as defect and an outer area of the injury labeled as transition). Cross-  
4 sectioning, Masson's staining, and quantitative classification using QuPath<sup>20</sup> of the  
5 extracted biopsies revealed five different types of tissue (debris, healthy in-tact muscle,  
6 necrotic muscle, granulation tissue and connective tissue, Figure 3C). At the superficial  
7 edge of the wound, we observed a thick scab and granulation tissue at both time points  
8 and tissue locations, respectively. At seven days post VML injury, both healthy in-tact  
9 muscle and connective tissue were co-located in the deep edge of the wound with necrotic  
10 muscle interspersed between the superficial and deep edge. At 14 days post VML injury,  
11 development of a fibrotic scar, as observed in our murine model, is detected with a  
12 minimal amount of healthy in-tact muscle in the transition location. These results  
13 demonstrate a conserved response to VML whereby muscle regeneration is initiated and  
14 supplanted by fibrosis.

15 To determine if the molecular observations we made in the murine model were  
16 conserved in the canine, we performed spatial transcriptomics on tissue sections  
17 collected at 7- and 14-days post VML injury in a canine. Biopsies were collected from  
18 both a more central area and an outer area of the injury (Figure 4A). All biopsies, including  
19 from both timepoints, were collected from the same animal. At 7-dpi, some remaining  
20 myofibers were observed within the defect, whereas by 14-dpi there was a dense region  
21 of mononucleated cells at the surface of the defect and substantial extracellular matrix  
22 with some cellularity below, indicative of fibrosis (Fig. 4B). We generated nearly 455  
23 million sequencing reads, and each demultiplexed read was spatially mapped yielding  
24 8,636 location-specific barcodes with a median UMIs per spot ranging between 4-8.5  
25 thousand across the tissues, and a median unique genes per spot ranging from 1.5-2.3  
26 thousand across the tissues (Supp. Table 2, Supp. Fig. 3). SpGEX data normalization,  
27 scaling, dimensional reduction, and clustering revealed transcriptional similarity among  
28 samples collected from the same timepoint, though spatial heterogeneity was also evident  
29 as the spots from different tissues clustered separately (Fig. 4C). We performed  
30 differential gene expression analysis across the samples and identified transcripts  
31 indicative of an initial myogenic response including upregulation of troponins (*TNNT1*,  
32 *TNNT3*, *TNNC1*) within the defect region at 7dpi. At the outer edge of the wound at 7-dpi,  
33 upregulated transcripts were largely associated with inflammation (*CTSS*, *PLAU*, *CCL2*,  
34 *CCL3*, *CCL4*, *SPP1*). In contrast, at 14-dpi, both tissue samples were upregulated for  
35 transcripts associated with ECM deposition (*COL11A1*, *FN1*, *ACTG2*) and ECM  
36 remodeling (*MMP1*, *MMP12*), as well as inflammation (*S100A8*, *IL1R2*, *PTGS2*,  
37 *S100A12*, *CXCL8*) (Figure 4D).

38 Next, we probed whether cellular dynamics and spatial patterning observed in the  
39 murine model were conserved in the canine VML defects. Overlays of marker genes for  
40 *m*øs (*ADGRE1*), MDCs (*ASPN*), and myogenic cells (*MYOG*) suggest myogenic cells and  
41 MDCs are present within the defects at 7-dpi, with some *m*øs localized principally on the  
42 superficial edge (Figure 4E). By 14-dpi, myogenic gene expression is undetectably low,  
43 while expression of both *ASPN* and *ADGRE1* is increased. Moreover, the *m*øs, based on  
44 *ADGRE1* expression, appear to infiltrate deeper into the defect (Figure 4E). To assess  
45 whether similar signaling pathways were involved in the canine response as in the murine  
46 response, we generated gene module scores with the canine gene analogs to the

1 significant LR interactions predicted by CellChat from the murine data (Figure 4F). The  
2 pro-fibrotic signaling molecules were highly expressed at 14-dpi, and spatially aligned  
3 with marker gene expression for MDCs and møs. We also observed some overlap of mø  
4 and MDC signaling genes, suggesting that these cell types are communicating in the  
5 canine model as well to contribute to fibrotic development. The expression of myogenic  
6 signaling genes was higher at 7-dpi and more localized to where MDC signaling  
7 transcripts were expressed than where mø genes were. Since several of these LRs are  
8 associated with TGF $\beta$ -signaling (*CD47*, *THBS1*, and others), and TGF $\beta$ -signaling is a  
9 known driver of muscle fibrosis via FAPs<sup>21</sup> and MuSCs<sup>22-24</sup> in rodent models, we sought  
10 to understand localization of TGF $\beta$ -signaling in the canine. We observed substantial  
11 expression of both *TGFB1* and *TGFBR2* throughout the defects at all timepoints (Figure  
12 4G). While *TGFB1* expression is similar at both timepoints, *TGFBR2* is upregulated at 7-  
13 dpi, which suggests may participate in the myogenic to fibrotic switch. Together, these  
14 results suggest that both the cellular and molecular patterns that occur in the murine VML  
15 model are conserved in a large animal model, though the timeline of the response is  
16 delayed.

17

### 18 *Interruptions to TGF $\beta$ modulates spatial crosstalk that contributes to fibrosis*

19 Based on the observed activation of fibrotic signaling between møs, MDCs, and  
20 MuSCs post VML, high expression of *TGFB1* and *TGFBR2* in the canine, and prior  
21 observations of improved functional recovery, enhanced myogenesis, and reduced  
22 fibrosis post *TGFBR2* inhibition in mice<sup>9,23</sup>, we sought to understand the spatial and  
23 signaling implications of pharmacologically inhibiting *TGFBR2*. A cohort of mice received  
24 bilateral VML defects to the TA followed by treatment with ITD1 in one limb and vehicle  
25 in the contralateral limb (Fig. 5A). At 7-dpi, we stained sections with H&E to observe and  
26 annotate tissue morphology into the three zones and generated matched spGEX datasets  
27 (Supp. Fig. 4A-B). Consistent with improvements in function and reduced fibrosis, gene  
28 set enrichment analysis comparing the defect zone in treated and untreated TAs showed  
29 upregulation of terms associated with myogenesis and muscle repair (Supp. Fig. 4C).  
30 Integration with scRNA-Seq datasets to localize cell populations across the tissues  
31 predicted reductions in macrophages throughout the tissue, reductions in MDCs in the  
32 transition zone, and the presence of myogenic cells in the defect zone (Fig. 4B, n=4  
33 tissues from 4 mice, two-sample, two-sided t-test). Immunofluorescent staining of serial  
34 tissue sections confirmed the spGEX predictions of reduced PDGFR $\alpha$ + MPCs and  
35 increased myogenic cells following ITD1 treatment, though CD68+ macrophages were  
36 increased in the defect zone (Fig. 4C, Supp. Fig. 4D-F, n=3-4 tissues from 3-4 mice, two-  
37 sample, two-sided t-test). This result may be driven by transcriptional differences in the  
38 macrophage populations that result from ITD1 treatment. Together, this suggests that  
39 inhibiting TGF $\beta$  signaling via the *TGFBR2* receptor reduces the biochemical signaling  
40 within the defect zone that is preventing a MuSC-mediated regenerative response.

41 To further understand the implications of ITD1 treatment on regeneration post-  
42 VML, we performed a MAST<sup>25</sup> differential gene expression analysis on the defect and  
43 transition zones (Figure 4D). In line with increased myogenic cells populating the defect,  
44 we observed increased *Cdh15* and *Ncam1* expression along with reduced inflammatory

1 signaling genes (*Ptprc*, *Ccl2*, *Ccl3*, *Ccl9*, *Gas6*, *Tnfrsf1b*, *Lgals9*, *Sema4a*). Within the  
2 transition zone, ITD-1 treatment reduced expression of several of the pro-fibrotic ligands  
3 and receptors predicted by CellChat (*Cd44*, *Tnfrsf1a*, *Gas6*). Interestingly, among the  
4 upregulated genes were *Nkg7* and *Ccl5*, which are associated with NK cells<sup>26</sup> and  
5 cytolytic NK cell signaling post VML<sup>9</sup>. Overall, ITD1 treatment reduced many of the pro-  
6 fibrotic signaling ligands and receptors predicted to be activated post VML by CellChat  
7 (Figure 4E), including reduced  $\text{m}\phi$  ligands in all zones, reduced  $\text{m}\phi$  receptors in the intact  
8 zone, and reduced MDC ligands and receptors in the transition zone. In line with improved  
9 regeneration and an enhanced myogenic response, MuSC ligands and receptors were  
10 increased in the defect zone post treatment (n=4 tissues from 4 mice, two-sample, two-  
11 sided t-test). Collectively, our results show that blocking TGF $\beta$ 1 signaling creates a  
12 biochemical environment in the defect zone more amenable to the MuSC regenerative  
13 response, acting on both the immune and mesenchymal accumulation and localization,  
14 and favorably altering signaling networks between  $\text{m}\phi$ s, MPCs, and MuSCs.

15

## 16 DISCUSSION

17 VML has consistently demonstrated a failure of regeneration<sup>27</sup>, fibrotic scarring<sup>5,8</sup>  
18 and reductions in muscle function<sup>2</sup>, but the cellular and molecular mechanisms that confer  
19 this behavior and their spatial context remain poorly understood. As a result, many  
20 therapeutics for VML have displayed limited improvements in muscle regeneration and  
21 functional output<sup>3,4</sup>. Our results address this need and demonstrate a conserved a  
22 signaling circuit between  $\text{m}\phi$ s and MPCs in murine and canine models of VML that  
23 contributes to fibrotic development and impinges on MuSC-mediated regeneration.  
24 Targeting the cellular crosstalk between  $\text{m}\phi$ s and MPCs through TGF $\beta$  inhibition  
25 improved muscle regeneration and infiltration of MuSCs in the defect as well as  
26 dampened fibrosis.

27 The microenvironment is known to impact cellular behavior and understanding  
28 cellular neighborhoods and which cell types co-localize in morphological regions that  
29 become dysregulated is critical to understanding signaling mechanisms and informing  
30 therapeutic development<sup>28</sup>. Herein, we identified a spatial patterning whereby  $\text{m}\phi$ s and  
31 MDCs heavily populate the region of muscle loss post-VML, while myogenic cells inhabit  
32 the boundary region between the defect and remaining intact muscle. The absence of  
33 MuSCs in the defect region at 7-dpi in the mouse and 14-dpi in the canine may be a result  
34 of an inability to migrate into or reside within the defect. We speculate this behavior may  
35 be mediated by an inadequate biophysical microenvironment<sup>29</sup> (increased tension of the  
36 matrix or lack of binding sites) and/or an inhibitive biochemical microenvironment<sup>30</sup> driven  
37 by  $\text{m}\phi$ -FAP signaling<sup>31</sup>. In support of this, we observed a highly similar program as chronic  
38 muscle fibrosis, whereby inflammatory  $\text{m}\phi$ s secrete latent TGF $\beta$ 1 that is activated  
39 biochemically by FAP-secreted factors and mechanically through strain on a stiffened  
40 matrix. The activated TGF $\beta$ 1 in turn induces FAP differentiation towards myofibroblasts<sup>32</sup>,  
41 and reduces TNF $\alpha$ -induced FAP apoptosis<sup>33</sup>. It is likely that the  $\text{m}\phi$ -FAP-directed  
42 communication is part of a feed-forward circuit whereby the FAPs also recruit  $\text{m}\phi$ s and  
43 monocytes and direct their phenotype towards fibrosis<sup>34</sup>. Co-localization of these two cell  
44 types within the defect, the predominantly pro-fibrotic ligand-receptor pairs, and the

1 reduction of FAPs and MDCs observed post TGF $\beta$ -inhibition suggests similar  
2 mechanisms occur post-VML.

3 FAPs are also important mediators of MuSC differentiation and self-renewal<sup>35</sup>  
4 following injury, in part due to their secreted factors. In the canine, which contains larger  
5 distances over which host tissue must respond to injury, we observed similar cellular  
6 dynamics of co-localized m $\phi$ s and MDCs, but varied kinetics whereby higher *PDGFRA*  
7 and myogenic gene expression is observed at 7-dpi, followed by the complete absence  
8 of myogenic gene expression at 14-dpi and increased expression of myofibroblast genes.  
9 Increased expression of *COL1A1* and *THY1* at 14-dpi in the canine also suggests a  
10 phenotypic transition of FAPs towards fibrogenesis<sup>36</sup>, which was at least partially  
11 ameliorated by ITD-1 treatment. It remains unclear how positioning between m $\phi$ s and  
12 MDCs is established in the VML wound and whether contraction of the fibrillary collagen  
13 matrix from MDCs signals to m $\phi$ s to promote chemotaxis. Conversely, increased  
14 secretion of latent TGF $\beta$ 1 by m $\phi$ s could drive increases in integrin binding in MDCs and  
15 induce matrix contraction. Further research is warranted to deconstruct the recruitment  
16 and ordering of cells that drive fibrotic scarring and inhibition of MuSC migration in the  
17 VML defect.

18 Muscle stem cell-mediated regeneration is coordinated by soluble cues from  
19 resident and infiltrating immune and progenitor cells, as well as physical structure  
20 provided by the extracellular matrix<sup>37,38</sup>. The absence of MuSCs in the defect region at  
21 7-dpi in the mouse and 14-dpi in the canine may be a result of an inability to migrate into  
22 or reside within the defect. Our observations that MuSCs have infiltrated into the defect  
23 at 7-dpi in the canine but are then replaced by dense ECM and abundant MPC marker  
24 gene expression at 14-dpi combined with our observations of more sustained MuSC  
25 infiltration into the defect region following TGF $\beta$  signaling inhibition suggests that  
26 manipulating inter-cellular signaling and the biochemical milieu resulting from VML could  
27 enhance regeneration. In line with these observations, we observed increases in  
28 expression of NK cell-related transcripts with ITD1 treatment. Prior work from our group  
29 has shown that NK cell infiltration into VML injuries reduces neutrophil abundance, and  
30 that the neutrophil secretome impairs myogenesis in vitro<sup>9</sup>. Thus, enhanced NK cell  
31 activity and restrained inflammation from neutrophils as a result of TGFBR2 inhibition  
32 could be one mechanism through which this intervention contributes to a more favorable  
33 biochemical environment for muscle regeneration.

34 VML continues to remain a significant clinical need and our results enhance  
35 understanding of the pathological drivers of this trauma. These datasets may yield  
36 enhancements in existing regenerative therapies and useful aids for quantifying  
37 therapeutic effects for VML.

38

### 39 **Acknowledgments**

40 The authors thank the University of Michigan DNA Sequencing Core for assistance  
41 with spatial sequencing library preparation. The authors also thank Josh Welch, Benjamin  
42 Levi, and Robert Tower for advice regarding bioinformatics analysis, along with other  
43 members of the Aguilar laboratory.

44



## 1 **Funding**

2 Research reported in this publication was partially supported by the National  
3 Institute of Arthritis and Musculoskeletal and Skin Diseases of the National Institutes of  
4 Health under Award Number P30 AR069620 (C.A.A.), the 3M Foundation (C.A.A.),  
5 American Federation for Aging Research Grant for Junior Faculty (C.A.A.), the  
6 Department of Defense and Congressionally Directed Medical Research Program  
7 W81XWH2010336 and W81XWH2110491 (C.A.A.), Defense Advanced Research  
8 Projects Agency (DARPA) “BETR” award D20AC0002 (S.F.B., C.A.A.) awarded by the  
9 U.S. Department of the Interior (DOI), Interior Business Center, the University of Michigan  
10 Rackham Graduate School, and the National Science Foundation Graduate Research  
11 Fellowship Program under Grant Number DGE 1256260 (J.A.L.). The content is solely  
12 the responsibility of the authors and does not necessarily represent the official views of  
13 the National Institutes of Health or National Science Foundation, the position or the policy  
14 of the Government, and no official endorsement should be inferred.

15

## 16 **Author contributions**

17 J.A.L., E.C.W., B.D.S., S.A.J., and M.K. performed the experiments, J.A.L., analyzed the  
18 data. J.A.L., and C.A.A. designed the experiments. E.B., B.N.B., and S.F.B. contributed  
19 reagents. C.A.A. supervised the work. J.A.L. and C.A.A. wrote the manuscript with  
20 additions from other authors.

21

## 22 **Competing interests**

23 The authors declare no competing interests.

24

## 25 **References**

- 26 1. Grogan, B. F. & Hsu, J. R. Volumetric muscle loss. *J. Am. Acad. Orthop. Surg.*  
27 **19**, (2011).
- 28 2. Garg, K. *et al.* Volumetric muscle loss: persistent functional deficits beyond frank  
29 loss of tissue. *J. Orthop. Res.* **33**, 40–6 (2015).
- 30 3. Greising, S. M., Corona, B. T., McGann, C., Frankum, J. K. & Warren, G. L.  
31 Therapeutic Approaches for Volumetric Muscle Loss Injury: A Systematic Review  
32 and Meta-Analysis. *Tissue Engineering - Part B: Reviews* vol. 25 510–525 (2019).
- 33 4. Corona, B. T., Rivera, J. C., Owens, J. G., Wenke, J. C. & Rathbone, C. R.  
34 Volumetric muscle loss leads to permanent disability following extremity trauma.  
35 *J. Rehabil. Res. Dev.* **52**, 785–792 (2015).
- 36 5. Greising, S. M. *et al.* Unwavering Pathobiology of Volumetric Muscle Loss Injury.  
37 *Sci. Rep.* **7**, 13179 (2017).
- 38 6. Sommerfeld, S. D. *et al.* Interleukin-36 $\gamma$ -producing macrophages drive IL-17-  
39 mediated fibrosis. *Sci. Immunol.* **4**, (2019).
- 40 7. Larouche, J., Greising, S. M., Corona, B. T. & Aguilar, C. A. Robust inflammatory  
41 and fibrotic signaling following volumetric muscle loss: A barrier to muscle  
42 regeneration comment. *Cell Death and Disease* vol. 9 1–3 (2018).
- 43 8. Aguilar, C. A. *et al.* Multiscale analysis of a regenerative therapy for treatment of  
44 volumetric muscle loss injury. *Cell Death Discov.* **4**, (2018).

- 1 9. Larouche, J. A. *et al.* Neutrophil and natural killer cell imbalances prevent muscle  
2 stem cell-mediated regeneration following murine volumetric muscle loss. *Proc.*  
3 *Natl. Acad. Sci.* **119**, (2022).
- 4 10. Wosczyzna, M. N. & Rando, T. A. A Muscle Stem Cell Support Group: Coordinated  
5 Cellular Responses in Muscle Regeneration. *Dev. Cell* **46**, 135–143 (2018).
- 6 11. Tidball, J. G. Regulation of muscle growth and regeneration by the immune  
7 system. *Nature Reviews Immunology* vol. 17 165–178 (2017).
- 8 12. Novak, M. L., Weinheimer-Haus, E. M. & Koh, T. J. Macrophage activation and  
9 skeletal muscle healing following traumatic injury. *J. Pathol.* **232**, 344–355 (2014).
- 10 13. Hurtgen, B. *et al.* Severe muscle trauma triggers heightened and prolonged local  
11 musculoskeletal inflammation and impairs adjacent tibia fracture healing. *J*  
12 *Musculoskelet Neuronal Interact* **16**, 122–134 (2016).
- 13 14. Sadtler, K. *et al.* Developing a pro-regenerative biomaterial scaffold  
14 microenvironment requires T helper 2 cells. *Science (80-. )*. **352**, 366–370 (2016).
- 15 15. Ståhl, P. L. *et al.* Visualization and analysis of gene expression in tissue sections  
16 by spatial transcriptomics. *Science* **353**, 78–82 (2016).
- 17 16. Foster, D. S. *et al.* Integrated spatial multiomics reveals fibroblast fate during  
18 tissue repair. *Proc. Natl. Acad. Sci. U. S. A.* **118**, (2021).
- 19 17. Rao, A., Barkley, D., França, G. S. & Yanai, I. Exploring tissue architecture using  
20 spatial transcriptomics. *Nat. 2021 5967871* **596**, 211–220 (2021).
- 21 18. Butler, A., Hoffman, P., Smibert, P., Papalexi, E. & Satija, R. Integrating single-  
22 cell transcriptomic data across different conditions, technologies, and species.  
23 *Nat. Biotechnol.* **36**, 411–420 (2018).
- 24 19. Jin, S. *et al.* Inference and analysis of cell-cell communication using CellChat.  
25 *Nat. Commun.* **12**, (2021).
- 26 20. Bankhead, P. *et al.* QuPath: Open source software for digital pathology image  
27 analysis. *Sci. Reports 2017 71* **7**, 1–7 (2017).
- 28 21. Mázala, D. A. G. *et al.* TGF- $\beta$ -driven muscle degeneration and failed regeneration  
29 underlie disease onset in a DMD mouse model. *JCI Insight* **5**, (2020).
- 30 22. Burks, T. N. & Cohn, R. D. Role of TGF- $\beta$  signaling in inherited and acquired  
31 myopathies. *Skelet. Muscle* **1**, 1–13 (2011).
- 32 23. Girardi, F. *et al.* TGF $\beta$  signaling curbs cell fusion and muscle regeneration. *Nat.*  
33 *Commun. 2021 121* **12**, 1–16 (2021).
- 34 24. Melendez, J. *et al.* TGF $\beta$  signalling acts as a molecular brake of myoblast fusion.  
35 *Nat. Commun. 2021 121* **12**, 1–11 (2021).
- 36 25. Finak, G. *et al.* MAST: A flexible statistical framework for assessing transcriptional  
37 changes and characterizing heterogeneity in single-cell RNA sequencing data.  
38 *Genome Biol.* **16**, 278 (2015).
- 39 26. Maghazachi, A. A. Role of Chemokines in the Biology of Natural Killer Cells. 37–  
40 58 (2010) doi:10.1007/82\_2010\_20.
- 41 27. Anderson, S. E. *et al.* Determination of a critical size threshold for volumetric  
42 muscle loss in the mouse quadriceps. *Tissue Eng. - Part C Methods* **25**, 59–70  
43 (2019).
- 44 28. Yang, B. A., Westerhof, T. M., Sabin, K., Merajver, S. D. & Aguilar, C. A.  
45 Engineered Tools to Study Intercellular Communication. *Adv. Sci. (Weinheim,*  
46 *Baden-Wurtemberg, Ger.* **8**, (2020).

- 1 29. Loreti, M. & Sacco, A. The jam session between muscle stem cells and the  
2 extracellular matrix in the tissue microenvironment. *npj Regen. Med.* 2022 71 7,  
3 1–15 (2022).
- 4 30. Magarotto, F. *et al.* Muscle functional recovery is driven by extracellular vesicles  
5 combined with muscle extracellular matrix in a volumetric muscle loss murine  
6 model. *Biomaterials* **269**, 120653 (2021).
- 7 31. Stepien, D. M. *et al.* Tuning Macrophage Phenotype to Mitigate Skeletal Muscle  
8 Fibrosis. *J. Immunol.* **204**, 2203–2215 (2020).
- 9 32. Biferali, B., Proietti, D., Mozzetta, C. & Madaro, L. Fibro–Adipogenic Progenitors  
10 Cross-Talk in Skeletal Muscle: The Social Network. *Front. Physiol.* **10**, 1074  
11 (2019).
- 12 33. Lemos, D. R. *et al.* Nilotinib reduces muscle fibrosis in chronic muscle injury by  
13 promoting TNF-mediated apoptosis of fibro/adipogenic progenitors. *Nat. Med.*  
14 2015 217 **21**, 786–794 (2015).
- 15 34. Wilder Scott, A. R., Arostegui, M., Schweitzer, R., Rossi, F. M. & Michael  
16 Underhill Correspondence, T. Hic1 Defines Quiescent Mesenchymal Progenitor  
17 Subpopulations with Distinct Functions and Fates in Skeletal Muscle  
18 Regeneration. *Cell Stem Cell* **25**, 797–813 (2019).
- 19 35. Wosczyzna, M. N. *et al.* Mesenchymal Stromal Cells Are Required for  
20 Regeneration and Homeostatic Maintenance of Skeletal Muscle. *Cell Rep.* **27**,  
21 2029–2035.e5 (2019).
- 22 36. Farup, J. *et al.* Human skeletal muscle CD90 + fibro-adipogenic progenitors are  
23 associated with muscle degeneration in type 2 diabetic patients. *Cell Metab.* **33**,  
24 2201–2214.e11 (2021).
- 25 37. Zhang, W., Liu, Y. & Zhang, H. Extracellular matrix: an important regulator of cell  
26 functions and skeletal muscle development. *Cell Biosci.* 2021 111 **11**, 1–13  
27 (2021).
- 28 38. Webster, M. T., Manor, U., Lippincott-Schwartz, J. & Fan, C. M. Intravital Imaging  
29 Reveals Ghost Fibers as Architectural Units Guiding Myogenic Progenitors during  
30 Regeneration. *Cell Stem Cell* **18**, 243–252 (2016).

31  
32

### 33 Figure Captions

34

35 **Figure 1. Spatial transcriptomic profiling after volumetric muscle loss reveals pro-**  
36 **fibrotic spatial patterning in the injured site.** (A) Experiment schematic whereby  
37 spatial transcriptomics was performed on VML-injured tibialis anterior muscles at 7 days  
38 post injury. (B) Tissues were annotated into three zones—a defect zone, a zone of intact  
39 muscle, and a transition zone between the two. The defect zone is characterized by an  
40 abundance of mononucleated inflammatory cells, the transition zone contains centrally  
41 nucleated fibers and fibers with small Feret diameters and some mononucleated cell  
42 infiltration, and the intact muscle zone contains peripherally nucleated, mature fibers. (C)  
43 Distribution of unique molecular identifiers shows higher read counts at the location of the  
44 defect. (D) GOTerm analysis on the three zones shows an enrichment in inflammation-  
45 associated terms within the defect zone, an enrichment in muscle development and  
46 contraction terms in the transitional zone, and an enrichment in metabolism terms within

1 the intact muscle zone. Differentially expressed genes were calculated using Wilcoxon  
2 Sum Rank Test with post hoc analysis.  $\log_2$  fold change  $> 0.25$  and  $p_{\text{adjusted}} > 0.05$   
3 was considered significant. (E) Integration of spatial transcriptomics datasets with  
4 matched, cell-type-annotated single cell RNA-sequencing datasets using Seurat label  
5 transfer identifies an enrichment of macrophages within the defect and some infiltration  
6 into other zones. Pro-fibrotic mesenchymal derived cells are predicted to localize in the  
7 defect and transitional zones. Muscle stem cells are absent from the defect zone, but  
8 localize in both the transitional zone, and, to a lesser extent, the intact muscle zone.  
9  $**p < 0.01$ ,  $*p < 0.05$ , and ns denotes  $p > 0.05$  by one-way ANOVA with post-hoc analysis.  
10  $n = 4$  muscles from 2 male and 2 female mice. (F) Immunohistological stains confirm the  
11 spGEX-predictions of cell localization within the different zones.  $**p < 0.01$ ,  $*p < 0.05$ , and  
12 ns denotes  $p > 0.05$  by one-way ANOVA with post-hoc analysis.  $n = 3-4$  muscles from 2  
13 male and 2 female mice.

14  
15 **Figure 2. Signaling pathways between macrophages, mesenchymal derived cells,  
16 and muscle stem cells post VML are predominantly pro-fibrotic.** (A) Chord diagram  
17 displaying all significant interactions between macrophages, mesenchymal derived cells,  
18 and muscle stem cells determined using CellChat on the single cell RNA sequencing  
19 reference dataset. Many of these signaling pathways are associated with fibrosis  
20 (collagens, *Comp*, *Fn1*, laminins, thrombospondins, integrins, *Cd47*, *Cd44*, and  
21 syndecans). Interactions with  $p < 0.05$  based on CellChat's permutation test were  
22 considered significant. (B) Gene module overlays for the ligands and receptors predicted  
23 to be involved in significant cell-cell interactions show spatial proximity in the defect and  
24 transition zones. (C) Average ligand and receptor module scores across zones  
25 demonstrates higher scores for M $\phi$  and MDC signaling molecules in the defect zone,  
26 increased mesenchymal-derived signaling molecules in the transition zone compared to  
27 the intact zone, and higher MuSC module scores in the transition and intact zones.  
28  $***p < 0.001$ ,  $**p < 0.01$ ,  $*p < 0.05$  by two-sided, two-sample t-test.  $n = 4$  tissues from 2 male  
29 and 2 female mice.

30  
31 **Figure 3. Administration and characterization of VML defect in a canine model.** (A)  
32 Schematic of volumetric muscle loss injury to canine biceps femoris muscle. (B) Images  
33 of VML defect creation whereby the skin is opened and muscle is exposed (left) followed  
34 by surgical removal of a 10 cm x 4 cm volume of muscle (middle) and the remaining  
35 wound is left open (right). Scales are shown in middle and right images. (C) Masson's  
36 trichrome-stained sections of the punch biopsies. The superficial edge of the wound is  
37 located at the top of the image. Images were manually segmented to identify scab/debris  
38 (orange) at the wound surface, and automated image analysis using QuPath was  
39 performed to automatically identify healthy muscle (pink), necrotic muscle (black),  
40 granulation tissue (brown), and connective tissue (blue) within the remaining image. The  
41 top 6 mm of the sample, representing the active wound site at 7 and 14 days is shown.

42  
43 **Figure 4. VML in canine results in a regenerative response that is supplanted by a  
44 profibrotic network.** (A) Schematic of experiment design whereby tissues were collected  
45 from the center (defect zone) and edge (transition zone) of the defect at 7- and 14- days  
46 post VML injury to canine rectus femoris muscle. 10x Visium spatial gene expression

1 analysis was performed on sections of each biopsy. (B) H&E-stained sections of the  
2 punch biopsies. The superficial edge of the wound is located at the top of the image. (C)  
3 UMAP dimensional reduction of spots colored by sample. (D) Heatmap of top differentially  
4 expressed genes according to sample. (E) Overlays of marker genes for macrophages  
5 (*ADGRE1*), mesenchymal cells (*ASPN*), and myoblasts (*MYOG*). Myoblasts gene  
6 expression is observed in the defect at 7-dpi, but is completely absent at 14-dpi, whereas  
7  $m\phi$  and MDC associated gene expression increases. (F) Overlays of CellChat-predicted  
8 active signaling modules shows high expression at 14-dpi of MDC and  $m\phi$  ligand and  
9 receptor genes and reduced expression of MuSC signaling genes. (G) Overlays of  
10 *TGFB1* and *TGFBR2* show elevated expression throughout all biopsies at both 7 and 14-  
11 dpi.

12  
13 **Figure 5. TGF $\beta$  signaling inhibition reduces inflammation and enhances**  
14 **myogenesis within the VML defect.** (A) Experiment schematic whereby a cohort of mice  
15 received bilateral VML defects to the tibialis anterior muscles followed by intramuscular  
16 injection of saline (PBS) or TGFBR2-inhibitor ITD1. Spatial transcriptomics analysis was  
17 performed at 7 days post injury. (B) Integration of spatial transcriptomics datasets with  
18 matched, celltype-annotated single cell RNA-sequencing datasets using Seurat label  
19 transfer identifies a trend towards reduced macrophages with the fibrotic transcriptional  
20 profile in all zones, fewer fibrotic mesenchymal derived cells in the transition zone, and  
21 increased numbers of muscle stem cells in the defect zone. Plots are annotated with p-  
22 values. n=3-4 tissues from 6 mice. Statistics performed using two-sided, two-sample t-  
23 test. (C) Immunohistological stains of macrophages (CD68), PDGFR $\alpha$ + mesenchymal  
24 cells, and RFP+ MuSCs and their progeny using a lineage tracing model show increased  
25 macrophages as a percentage of the defect region, reduced PDGFR $\alpha$ + mesenchymal  
26 cells, and increased MuSCs and their progeny following ITD1 treatment. \*p<0.05. n=3-4  
27 tissues from 6 mice. Statistics performed using two-sided, two-sample t-test. (D) Volcano  
28 plots showing differential gene expression as a result of ITD1 treatment in the defect (left)  
29 and transition zones (right). Many of the genes identified by CellChat as activated  
30 signaling genes were downregulated with ITD1 treatment. Differential expression was  
31 calculated using MAST, and genes with a p-adjusted value less than 0.05 were  
32 considered significant (yellow). (E) Violin plots of gene module scores for the  
33 macrophage, mesenchymal derived cell, and MuSC ligands and receptors (L&Rs)  
34 predicted to be involved in active signaling pathways post VML shows reduced  
35 expression of  $M\phi$  L&Rs in the transition zone, reduced expression of MDC L&Rs in the  
36 transition zone, and increased expression of MuSC L&Rs in the defect zone. Though not  
37 statistically significant, Macrophage L&R expression was also reduced in the defect zone  
38 post treatment with ITD1. \*p<0.05, #p = 0.06 by two-sample, two-sided t-test comparing  
39 average module scores for each tissue in each zone across treatments. n = 3-4 tissues  
40 per group from 3-4 mice.

41  
42 **Supplemental Figure 1. Characterization of volumetric muscle loss in tibialis**  
43 **anterior muscle.** (A) Representative images of tissues stained with picro-sirius red as  
44 well as quantification of collagen at each time point. n = 6-10 muscles. Full section 10X  
45 stitches were analyzed for each tissue. \*\*p<0.01, \*\*\*\*p<0.0001 by two-sided one-way  
46 ANOVA and Tukey's post-hoc analysis. (B) Heatmap of gene signatures for each zone.

1 **Supplemental Figure 2. Spatial transcriptomic overlays of genes associated with**  
2 **different cell types after volumetric muscle loss injury.** (A) Dotplot showing the  
3 expression of known cell-type marker genes in annotated spGEX spots. (B) Overlays of  
4 selected cell marker genes are consistent with Seurat label transfer annotations. (C)  
5 Spatial overlay of myonuclei prediction scores for each spot.

6  
7 **Supplemental Figure 3. Quality control assessment of spGEX datasets from**  
8 **canines post VML.** (A) Overlays of UMIs in each tissue section. (B) Overlays of the  
9 number of features identified in each spot.

10  
11 **Supplemental Figure 4. Characterization of ITD1-treated TA VML defects and**  
12 **differences among the transcriptional landscape of the defect zone compared to**  
13 **vehicle controls.** (A) Distribution of unique molecular identifiers shows higher read  
14 counts at the location of the defect and transitional zones, consistent with untreated  
15 tissues. (B) Tissues annotation into the three zones. (C) GOTerm analysis comparing  
16 ITD1 vs PBS-treated tissues in the defect zone. The defect zone in ITD1-treated tissues  
17 was enriched for terms associated with muscle repair and regeneration, consistent with  
18 increased numbers of Pax7+ cells and their progeny in the defects.

19  
20

## KEY RESOURCES TABLE

| REAGENT or RESOURCE                                                        | SOURCE                 | IDENTIFIER                   |
|----------------------------------------------------------------------------|------------------------|------------------------------|
| <b>Antibodies</b>                                                          |                        |                              |
| Rat anti-mouse Ly6G                                                        | Abcam                  | ab25377; RRID:AB_470492      |
| Rat anti-mouse CD68                                                        | BioRad                 | MCA1957; RRID:AB_322219      |
| Rabbit anti-mouse RFP                                                      | Rockland               | 600-401-379; RRID:AB_2209751 |
| Chicken anti-mouse GFP                                                     | Abcam                  | ab13970; RRID:AB300798       |
| Rabbit anti-mouse Laminin 1+2                                              | Abcam                  | ab7463; RRID:AB_305933       |
| Goat anti-chicken IgY (H+L), Alexa Fluor 488 conjugate                     | Thermo Fisher          | A32931TR; RRID:AB_2866499    |
| Goat anti-rat (H+L), Alexa Fluor 647 conjugate                             | Thermo Fisher          | A21247; RRID:AB_141778       |
| Goat anti-rabbit (H+L), Alexa Fluor 555 conjugate                          | Thermo Fisher          | A21247; RRID:AB_141778       |
| <b>Chemicals, Peptides, and Recombinant Proteins</b>                       |                        |                              |
| Dispase II (activity $\geq 0.5$ units/mg solid)                            | Sigma                  | D4693-1G                     |
| Collagenase Type II (654 U/mg, non-specific proteolytic activity 487 U/mg) | Life Technologies      | 17101015                     |
| DMEM, high glucose, pyruvate                                               | Life Technologies      | 11995065                     |
| Ham's F-10 Nutrient Mix                                                    | Life Technologies      | 11550043                     |
| Fetal Bovine Serum                                                         | Life Technologies      | 10437028                     |
| Normal Goat Serum                                                          | Abcam                  | Ab7481; RRID:AB_2716553      |
| Mouse on Mouse blocking reagent                                            | Vector Labs            | MKB-2213                     |
| Tissue Plus O.C.T Compound                                                 | Fisher Scientific      | 23-730-571                   |
| Hematoxylin                                                                | Ricca Chemical Company | 3530-16                      |
| Eosin                                                                      | EMD-Millipore          | 588X-75                      |
| Magnesium Sulfate Heptahydrate                                             | Sigma Aldrich          | 63138-250G                   |
| Sodium Bicarbonate                                                         | Sigma Aldrich          | S5761                        |
| SafeClear II                                                               | Fisher Scientific      | 23-044192                    |
| Direct Red 80                                                              | Fisher Scientific      | AAB2169306                   |
| Picric Acid                                                                | Sigma Aldrich          | P6744-1GA                    |
| Glacial Acetic Acid                                                        | Sigma Aldrich          | BP2401-500                   |
| Xylenes                                                                    | Sigma Aldrich          | 534056-4L                    |
| Permout                                                                    | Fisher Scientific      | SP15-100                     |
| Bovine Serum Albumin                                                       | Fisher Scientific      | BP9703-100                   |
| Prolong Diamond                                                            | Thermo Fisher          | P36965                       |
| Tween-20                                                                   | Sigma Aldrich          | P1379                        |
| TritonX-100                                                                | Sigma Aldrich          | T8787                        |
| Hoechst 33342                                                              | Thermo Fisher          | H3570                        |
| <b>Critical Commercial Assays</b>                                          |                        |                              |
| QIAshredder                                                                | Qiagen                 | 79656                        |
| Qiagen RNeasy Mini Kit                                                     | Qiagen                 | 217084                       |
| BioAnalyzer RNA Pico Assay                                                 | Agilent                | 5067-1514                    |
| Tissue Optimization                                                        | 10x Genomics           | 1000193                      |
| Visium Spatial Gene Expression                                             | 10x Genomics           | 1000187                      |
| <b>Deposited Data</b>                                                      |                        |                              |
| spGEX datasets                                                             | This Manuscript        | GSEXXXXXX                    |
| <b>Experimental Models: Organisms/Strains</b>                              |                        |                              |

|                                                                      |                                            |                                                                                                                                                                     |
|----------------------------------------------------------------------|--------------------------------------------|---------------------------------------------------------------------------------------------------------------------------------------------------------------------|
| C57BL/6J wild-type mice (3 months)                                   | Jackson Labs                               | Strain 000664;<br>RRID:IMSR_JAX:000664                                                                                                                              |
| PDGFRa <sup>EGFP</sup> mice (3 months)                               | University of Michigan                     | Strain 007669;<br>RRID:IMSR_JAX:007669                                                                                                                              |
| Pax7Cre <sup>ER/+</sup> ;Rosa26 <sup>dTomato/+</sup> mice (3 months) | University of Michigan                     | Strain 017763 crossed with strain 007676                                                                                                                            |
| <b>Software and Algorithms</b>                                       |                                            |                                                                                                                                                                     |
| SpaceRanger v1.3.0                                                   | 10x Genomics                               | <a href="https://support.10xgenomics.com/spatial-gene-expression/software/downloads">https://support.10xgenomics.com/spatial-gene-expression/software/downloads</a> |
| R v4.1.2                                                             | The R Foundation for Statistical Computing | <a href="https://www.r-project.org/">https://www.r-project.org/</a><br>RRID:SCR_001905                                                                              |
| MATLAB_R2020b                                                        | MathWorks                                  | <a href="https://www.mathworks.com/products/matlab.html">https://www.mathworks.com/products/matlab.html</a>                                                         |
| Seurat v4.1.0                                                        | Butler et al. 2019                         | <a href="https://satijalab.org/seurat/">https://satijalab.org/seurat/</a><br>RRID:SCR_007322                                                                        |
| CellChat v1.0.0                                                      | Jin 2021                                   | <a href="https://github.com/sqjin/CellChat">https://github.com/sqjin/CellChat</a>                                                                                   |
| ggplot2 v3.3.5                                                       | Wickham 2016                               | <a href="https://ggplot2.tidyverse.org">https://ggplot2.tidyverse.org</a><br>RRID:SCR_014601                                                                        |
| dplyr v1.0.8                                                         | Wickham 2016                               | <a href="https://dplyr.tidyverse.org/">https://dplyr.tidyverse.org/</a><br>RRID:SCR_016708                                                                          |
| Tidyverse v1.3.0                                                     |                                            | <a href="https://www.tidyverse.org/">https://www.tidyverse.org/</a><br>RRID:SCR_019186                                                                              |
| ImageJ v2.1.0                                                        |                                            | <a href="https://imagej.net/ImageJ">https://imagej.net/ImageJ</a><br>RRID:SCR_002285                                                                                |
| MAST v1.20.0                                                         | Finak 2015                                 | <a href="https://github.com/RGLab/MAST">https://github.com/RGLab/MAST</a><br>RRID:SCR_016340                                                                        |
| EnhancedVolcano v.1.12.0                                             | Blighe K. et al. 2019                      | <a href="https://github.com/kevinblighe/EnhancedVolcano">https://github.com/kevinblighe/EnhancedVolcano</a>                                                         |
| QuPath                                                               | Bankhead et al. 2017                       | RRID:SCR_018257                                                                                                                                                     |
| <b>Other</b>                                                         |                                            |                                                                                                                                                                     |
| Bioinformatics analysis code                                         | This manuscript                            | <a href="https://github.com/larouchej/Spatial_VML">https://github.com/larouchej/Spatial_VML</a>                                                                     |

## METHODS

**Animals:** C57BL/6 wild-type and PDGFRa<sup>EGFP</sup> female and male mice were obtained from Jackson Laboratories or a breeding colony at the University of Michigan (UM). Pax7Cre<sup>ER/+</sup>-Rosa26<sup>dTomato/+</sup> mice were obtained from a breeding colony at UM and administered 5 daily 100uL intraperitoneal injections of 20mg/mL tamoxifen in corn oil. All mice were fed normal chow ad libitum and housed on a 12:12 hour light-dark cycle under UM veterinary staff supervision. All procedures were approved by the University Committee on the Use and Care of Animals at UM and the Institutional Animal Care and Committee and were in accordance with the U.S. National Institute of Health (NIH).

Approval for the procedures conducted on canines in this study was obtained from the University of Pittsburgh Institutional Animal Care and Use Committee. A VML defect was created in the biceps femoris muscle of one female canine (*Canis familiaris*). Tissue biopsies were collected at multiple time points on days 7 and 14 following injury for spatial transcriptomics analysis.



**Mouse Injury Model:** Mice were anesthetized with 1.5% isoflurane and administered 0.1mg/kg buprenorphine in 100 $\mu$ L saline via IP injection. Puralube ointment was applied to both eyes. Hair was removed from the hindlimbs using Nair hair removal cream. The surgical area was sterilized three times with Providone Iodine followed by 70% ethanol. A 0.5cm incision was made in the skin on the anterior side of each tibialis anterior (TA) muscle followed by the removal of a 2mm full thickness muscle section from middle of the TA muscle. The skin was sutured closed using 6-0 prolene sutures, which were removed 7 days post-surgery.

**Canine Injury Model:** Prior to sedation, the right lateral thigh was shaved. Surgical plane anesthesia was induced with intravenous administration of 2% thiopental sodium, tracheal intubation, and delivery of inhaled isoflurane. The surgical site was prepared by scrubbing with 70% ethyl alcohol, followed by a topical 10% povidone-iodine solution. The greater trochanter and lateral epicondyle of the femur were identified to establish anatomic landmarks. A 10 x 4 cm wide uppercase “I” shape was marked to establish the initial incision point halfway between the greater trochanter and lateral epicondyle. Skin was incised along the outline of the “I” shape, the subcutaneous tissue was bluntly dissected, and the skin was retracted to visualize the biceps femoris. A corresponding 10 cm x 4 cm template was used to delineate the peripheral borders of the planned defect. The muscle tissue and fascia were removed to a depth of 2-3 cm, depending on the anatomy and size of the dog with care taken to avoid cutting through the bottom of the muscle. Hemorrhage was controlled with electrocautery. The overlying skin was removed, with the result that the wound was left exposed to mimic the typical clinical scenario of spontaneous traumatic injury. The upper leg and wound site were covered with sterile dressings. All animals received postoperative antibiotic prophylaxis for the first 5 days (cephalexin, 25 mg/kg) and an analgesic every 8-12 hours for the first 5 days (buprenorphine 0.002 mg/kg). Each animal was observed daily per routine clinical parameters, including temperature, appetite, activity, and ability to bear weight on the operated leg. Animals were fed a high energy, high protein diet (Advanced Protocol High Density Canine Diet; PMI Nutrition LLC, Henderson, CO) and given unlimited access to water.

## Histology

**Tissue Sectioning:** Muscles were simultaneously flash frozen and embedded in optical cutting temperature (OCT) compound according to 10x Genomics Demonstrated Protocol CG000240 Revision D, then stored at -80°C. Serial cross sections were cut using a cryotome at -20°C at the midpoint of the injury and collected on positively charged glass slides (Fisher #12-550-15). Duplicate cross sections from each tissue were placed on each slide.

**Hematoxylin and Eosin Staining:** Slides were submerged in hematoxylin for two minutes followed by two sets of ten quick immersions in distilled water. Slides were then submerged in Scott’s tap water (20.0g magnesium sulfate heptahydrate and 2.0g sodium bicarbonate in 1L tap water) and distilled water for one minute as well as one set of ten immersions in 80% ethanol. After one minute of Eosin immersion slides were immersed ten times in two different 95% ethanol baths and a 100% ethanol bath. Finally, slides were submerged in SafeClear II for one minute, and two drops of Permount were added before placing the coverslip on top. Brightfield images were taken using a motorized Olympus IX83 microscope at 10X magnification and stitched using the Olympus CellSense software to obtain an image of the complete tissue section.

**Picrosirius Red Staining:** Slides were removed from -80°C, thawed to room temperature, and dried for 30 minutes before fixing in 4% paraformaldehyde in PBS for 15 minutes at room temperature. Following fixation, slides were washed 3 times in PBS for 5 minutes each, 2 times in deionized water for 5 minutes each, allowed to dry for 10 minutes at RT, and incubated in 0.5g Direct Red 80 solubilized in 500mL Picric Acid for 1 hour at room temperature. Next, slides were washed twice with acidified water (2.5mL Glacial Acetic Acid in 500mL deionized water) for 5 minutes each followed by 2 washes in deionized water for 5 minutes each. Tissue samples were then dehydrated in a series of ethanol washes (50%, 70%, 70%, 90%, 100%, 100%), incubated in Xylenes twice for 5 minutes each, and mounted with Permount. Brightfield images were taken using a motorized Olympus IX83 microscope at 10X magnification and stitched using the Olympus CellSense software to obtain an image of the complete tissue section. Images were converted

to RGB stack and converted to greyscale. To calculate collagen fraction, the green channel was automatically thresholded and measured using ImageJ, then divided by the surface area of the tissue section based on thresholding the red channel to include only the tissue. Two or three sections per tissue were stained and quantified, then averaged to get the percentage of collagen for each tissue.

**Immunofluorescent Staining:** Immunofluorescence staining was performed as previously reported(1). For RFP and immune stains, slides were removed from -80°C, thawed to room temperature for 30 minutes, then fixed in ice-cold 100% acetone at -20°C for 10 minutes. Following fixation, slides were air-dried for 10 minutes at RT, tissue sections were circled with Hydrophobic Barrier PAP Pen and allowed to dry at room temperature. Tissue sections were rehydrated in PBS for 5 minutes at RT, then blocked for 1 hour at room temperature using 10% normal goat serum (NGS) in PBS. After blocking, slides were incubated overnight at 4°C in a solution containing primary antibodies (rabbit anti-laminin 1+2 (1:500 dilution), rat anti-laminin 2 alpha (1:1000), rat anti-CD68 (1:50), rabbit anti-RFP (1:100)) diluted in 10% NGS. Primary antibodies were then washed three times for 5 minutes with PBS at room temperature. Secondaries (1:500 dilution) and Hoescht 33342 (1:500 dilution) were added in PBS and incubated for 1 hour at RT in the dark. After incubation, slides were washed three times with PBS and a coverslip was mounted using Prolong Diamond fluorescent mounting medium. For GFP stain, slides were warmed to room temperature, tissue sections circled in PAP Pen, re-hydrated in PBS three times for 5 minutes, blocked for 30 minutes at RT in MOM blocking reagent, and incubated overnight at 4°C in primary antibodies (1:1000 GFP and 1:500 anti-laminin 1+2) diluted in MOM Protein Concentrate. Following primary incubation, slides were washed 3 times for 5 minutes with PBS and incubated in secondary antibodies (AF488 anti-chicken 1:250, AF555 anti-Rabbit 1:500, 1.5uL/mL Hoescht 33342) diluted in MOM protein concentrate for 1 hour at RT. Finally, slides were washed three times for 5 minutes in PBS, then mounted with Prolong Diamond. Slides were allowed to dry overnight, then stored at 4°C until imaging. Images were acquired with a Nikon A1 confocal microscope equipped with Colibri 7 solid state light source and pseudo colored using ImageJ, then quantified using MATLAB.

**Automated Image Analysis with QuPath:** Samples for histologic analysis were obtained from independent animals not sampled for spatial transcriptomics. Following euthanasia, the full thickness of the entire VML defect was harvested en bloc and fixed in 10% neutral buffered formalin. Post fixation, biopsies from the VML defect and transition zone between the wound bed and wound margin were obtained using 6-8 mm diameter biopsy punches. The specimens were trimmed, embedded in paraffin, and sectioned at 5 µm prior to staining with Masson's Trichrome. Slides were imaged using a Motic Easy Slide Scanner at a 40X magnification for automated analysis using QuPath(2). QuPath, an open-source image analysis software, was then used to classify regions within the scanned images. QuPath was used to identify healthy muscle, necrotic muscle, granulation tissue, and connective tissue by training the artificial neural network with a library of samples from canine VML defects ranging from 2-42 days post injury. Manual segmentation of scab/debris at the superficial edge of the tissue was performed, and QuPath was then used to classify the remaining tissues within the image. A colored mask was then created to enable visualization of the distinct tissue regions within the sample. Analysis was limited to the most superficial 6 mm of the wound bed, representative of the active wound zone, and to be representative of the tissue biopsies which were collected for spatial transcriptomic analysis.

## Spatial Gene Expression Sequencing

**Sample Preparation and Sequencing:** Tissues (mouse and canine) were simultaneously flash-frozen and OCT embedded as described above. RNA quality for each tissue was assessed using the QIAshredder and RNeasy Mini kit for RNA extraction according to manufacturer's protocols followed by BioAnalyzer RNA Pico assay and tissues with RNA integrity values above 7 were used for spatial gene expression (spGEX) profiling. Permeabilization times were determined for each timepoint on mouse and canine VML-injured tissues using the 10x Genomics Tissue Optimization kit and corresponding protocol. Canine tissues were permeabilized for 24 minutes, and mouse tissues were permeabilized for 18 minutes. SpGEX profiling was performed using the 10x Visium platform according to manufacturer's instructions and sequenced on a NovaSeq 6000.

**Data Processing and Analysis:** Manual image alignment was performed using 10x Loupe Browser. 10x SpaceRanger v1.3.0 software's mkfastq and count command were run with default parameters and aligned to the mm10-2020-A or the CanFam3.1 v97 genome for mouse and canine datasets, respectively. Tissues were annotated into zones using Loupe Browser v6. HDF5 matrix files and zone annotations were imported into R (<https://www.r-project.org/>) using the Seurat v4 package(3). Count data were normalized using SCTransform, followed by PCA dimension reduction and clustering using default parameters and the first 30 dimensions. GOTerm analysis was performed on scaled, normalized data using FindAllMarkers followed by ClusterProfiler's enrichGO function on upregulated genes. Mitochondrial and ribosomal genes were removed prior to GOTerm enrichment analysis. For mouse datasets, spot annotation with cell-types was performed using Seurat label transfer with a matched single cell RNA-Seq reference generated from 3mm quadriceps defects at 7 days post injury(4). Ligand-receptor analysis was performed on the single cell RNA-Seq dataset used for label transfer using CellChat(5). Gene modules were generated using Seurat's AddModuleScore function for overlays. Differential gene expression comparing the defect and transition zones between treated and untreated tissues was performed using MAST(6). Plots were generated using ggplot2, EnhancedVolcano, and Seurat.

## Statistics

Experiments were repeated at least twice. Bar graphs show mean  $\pm$  standard error. Statistical analysis was performed in R using two-sample Student's t-test assuming normal distribution and equal variances or one-way ANOVA, as specified in figure captions. All statistical tests performed were two-sided. Outliers were determined using the Tukey's fences method with  $k = 1.5$  and removed from further analysis. P-values less than 0.05 were considered statistically significant.

1. J. F. Markworth, *et al.*, Resolvin D1 supports skeletal myofiber regeneration via actions on myeloid and muscle stem cells. *JCI Insight* **5** (2020).
2. P. Bankhead, *et al.*, QuPath: Open source software for digital pathology image analysis. *Sci. Reports* **2017 71 7**, 1–7 (2017).
3. A. Butler, P. Hoffman, P. Smibert, E. Papalexi, R. Satija, Integrating single-cell transcriptomic data across different conditions, technologies, and species. *Nat. Biotechnol.* **36**, 411–420 (2018).
4. J. A. Larouche, *et al.*, Neutrophil and natural killer cell imbalances prevent muscle stem cell-mediated regeneration following murine volumetric muscle loss. *Proc. Natl. Acad. Sci.* **119** (2022).
5. S. Jin, *et al.*, Inference and analysis of cell-cell communication using CellChat. *Nat. Commun.* **12** (2021).
6. G. Finak, *et al.*, MAST: A flexible statistical framework for assessing transcriptional changes and characterizing heterogeneity in single-cell RNA sequencing data. *Genome Biol.* **16**, 278 (2015).

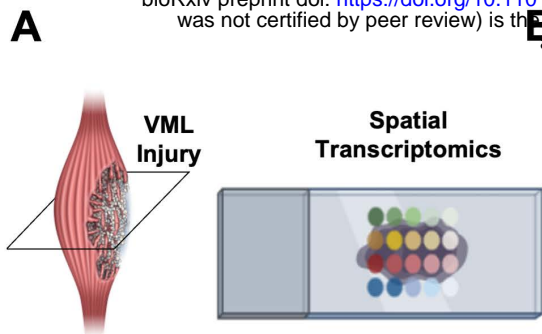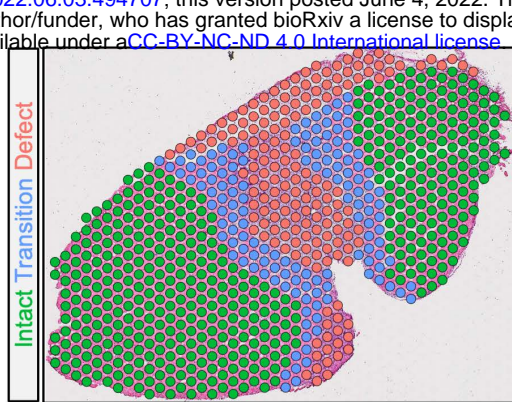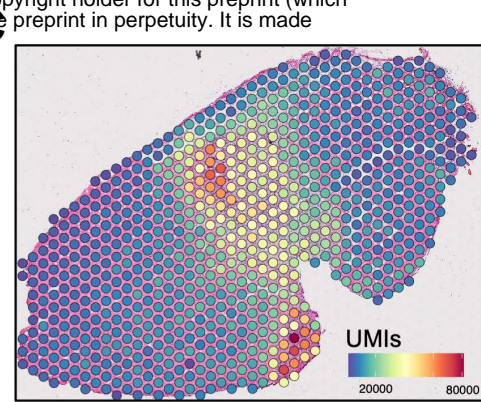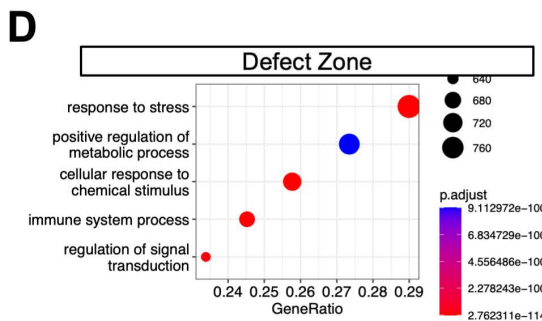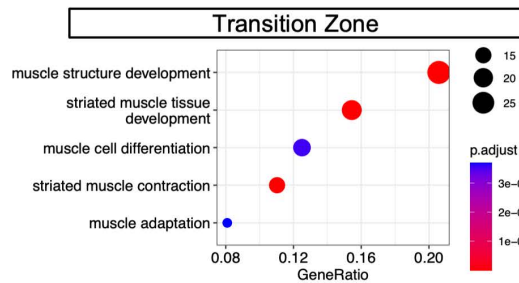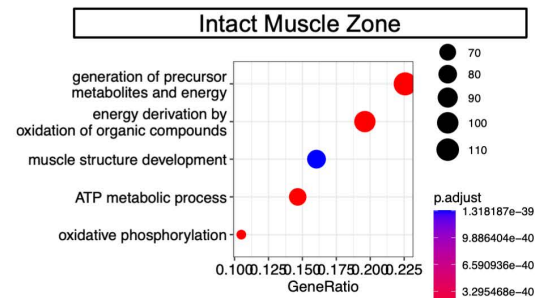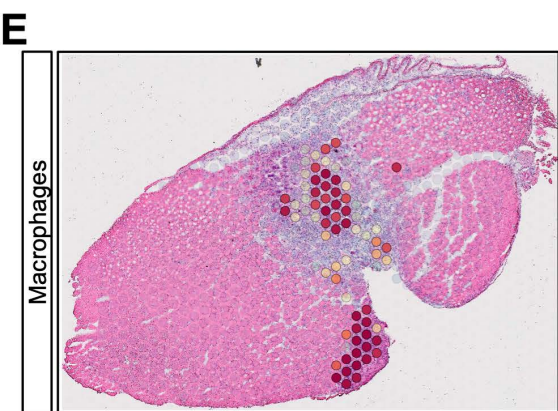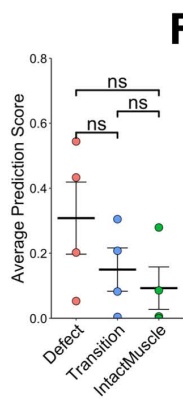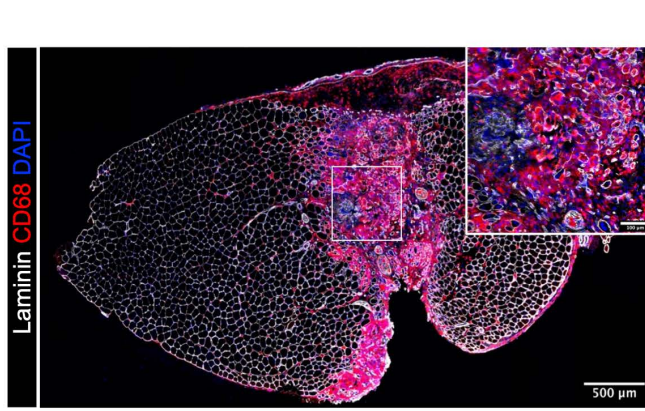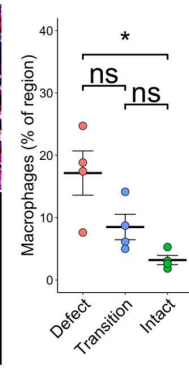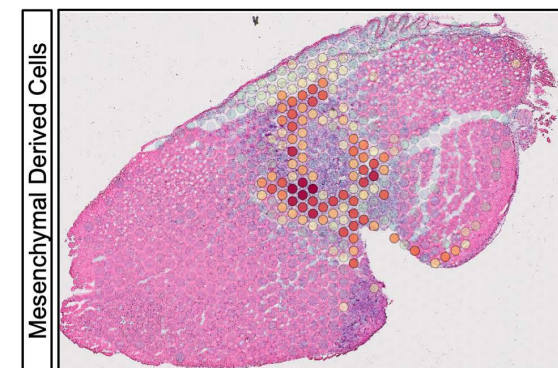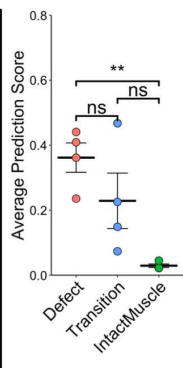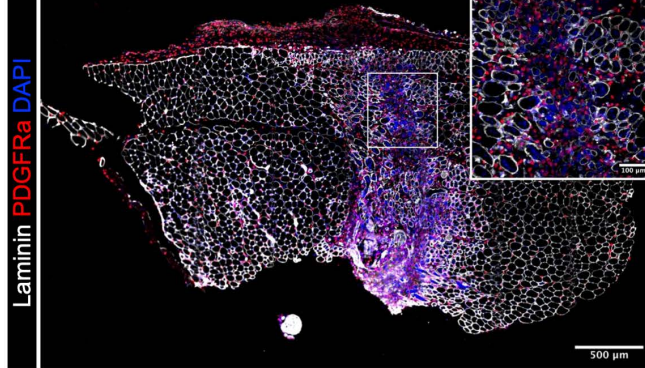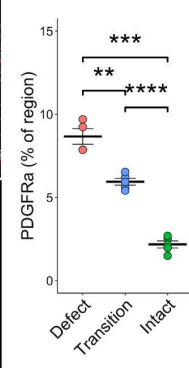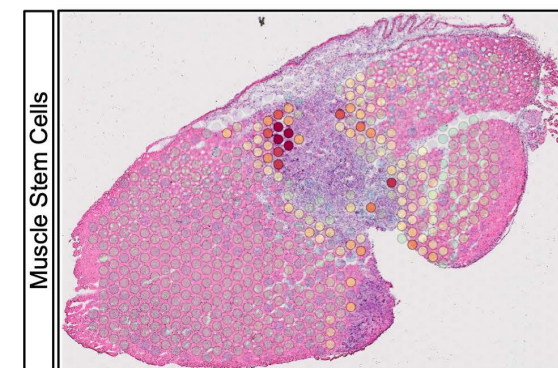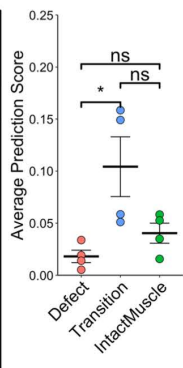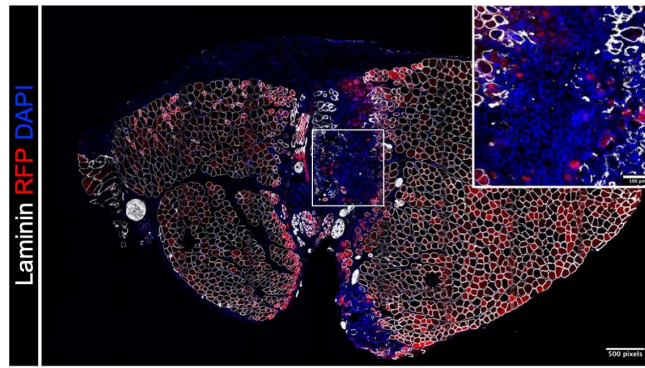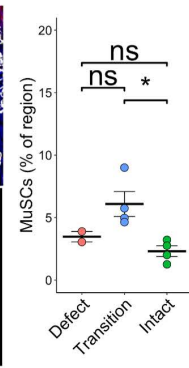

**A**

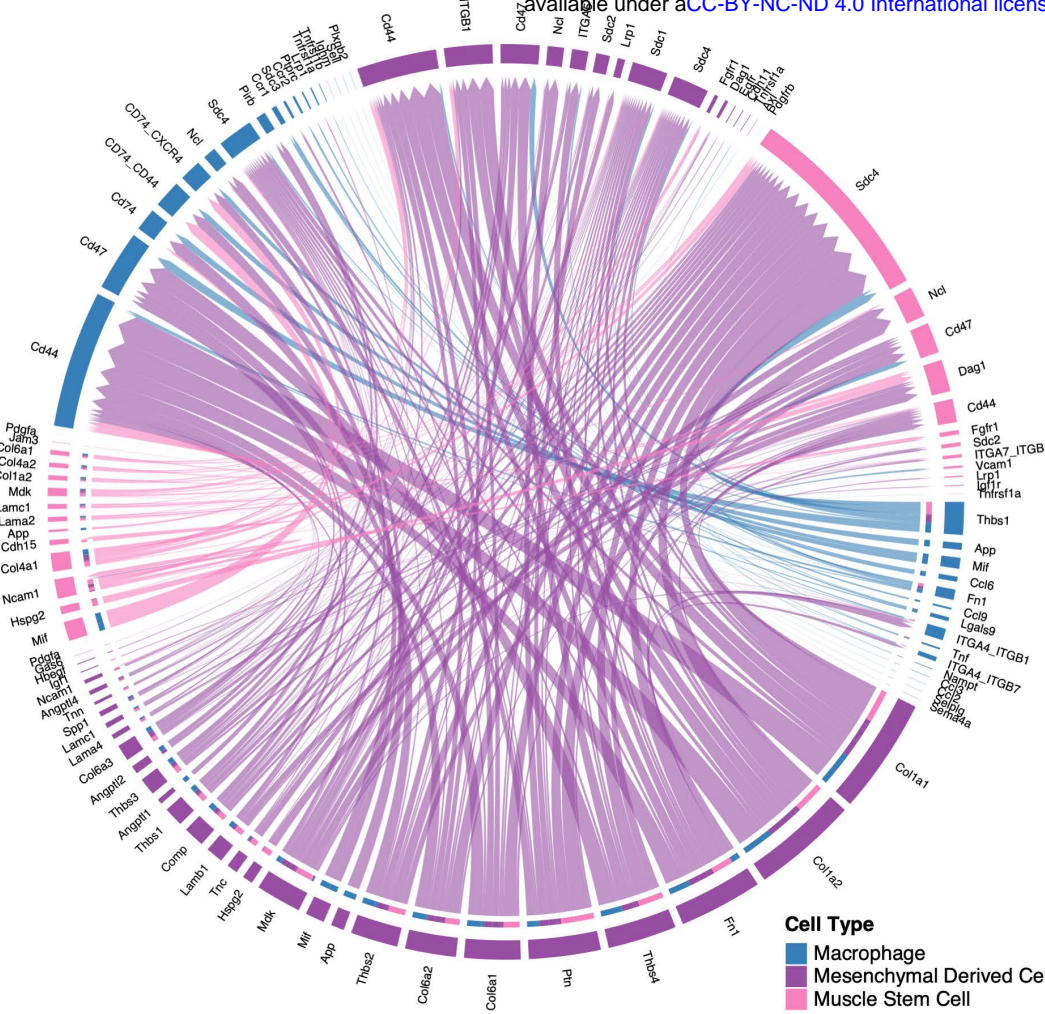

**B**

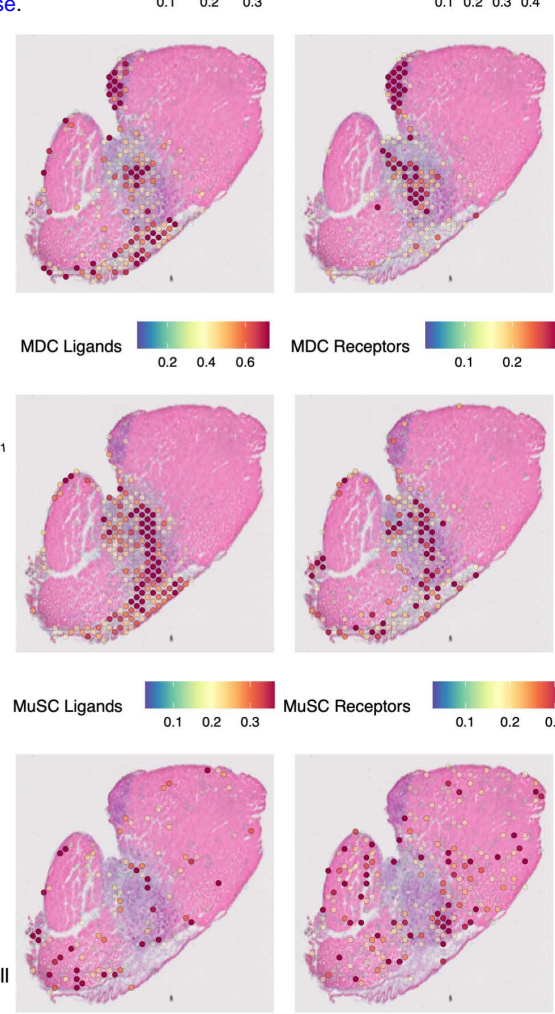

**C**

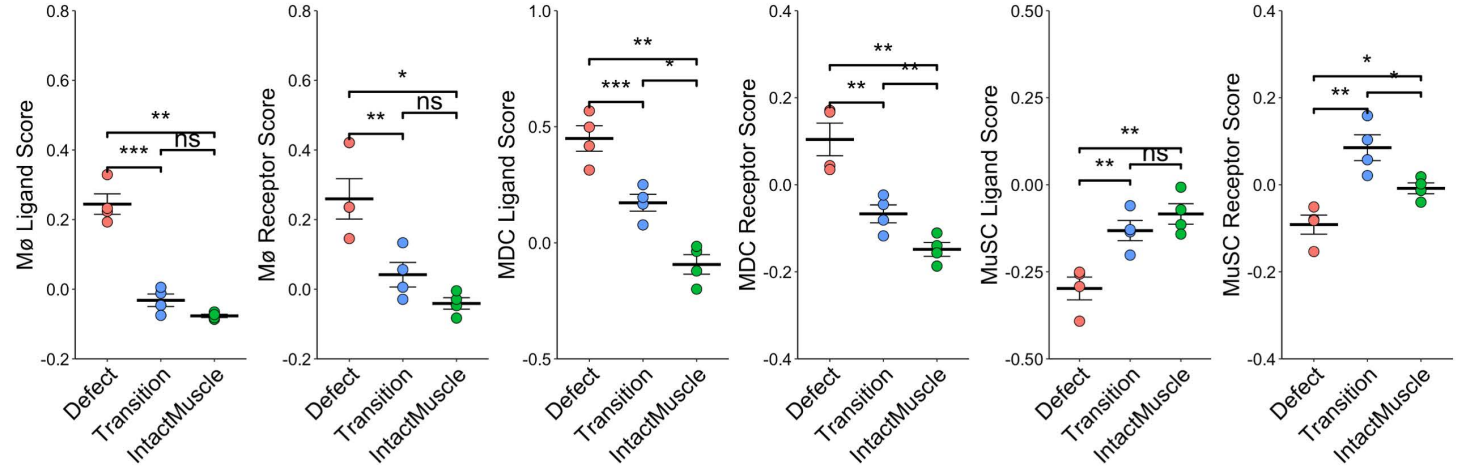

**A**

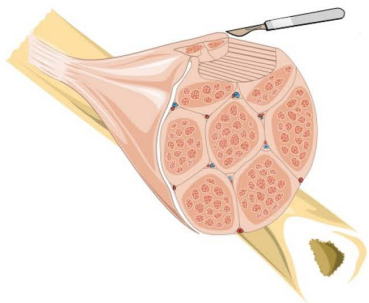

**B**

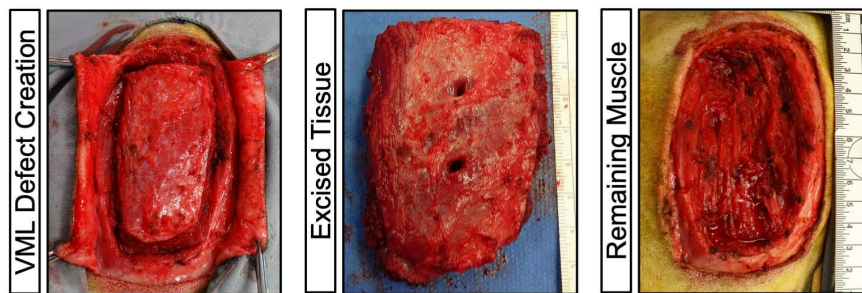

**C**

● Scab/Debris ● Healthy Muscle ● Necrotic Muscle ● Granulation Tissue ● Connective Tissue

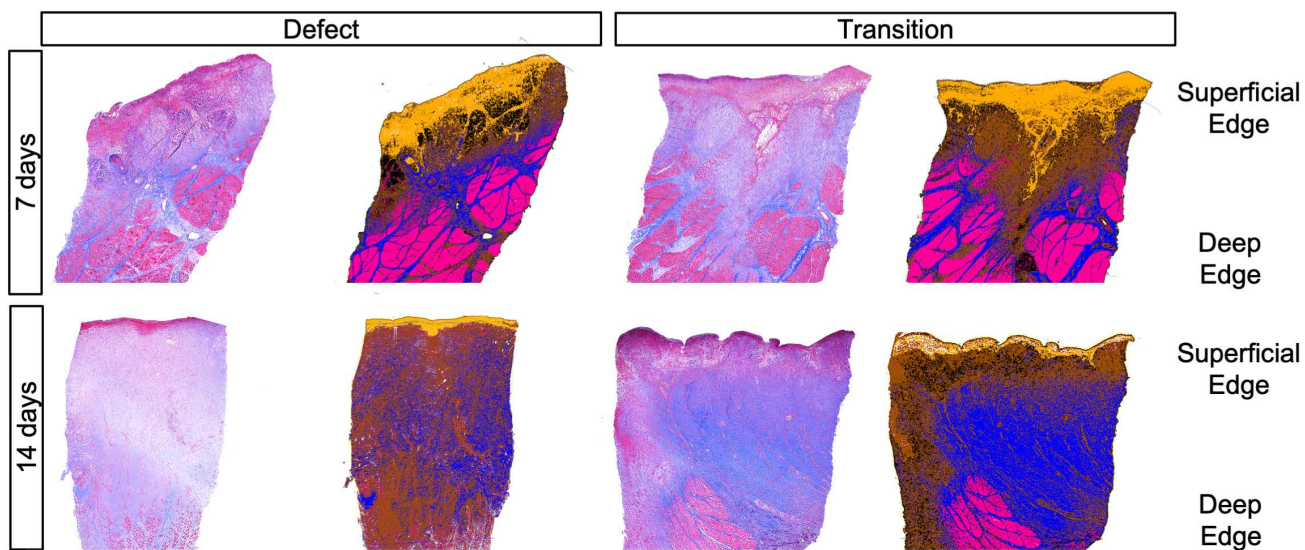

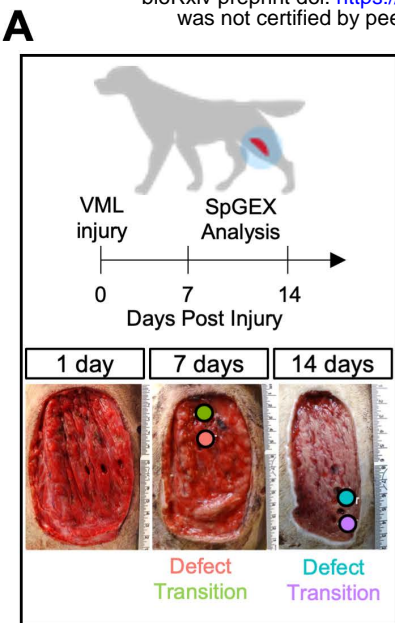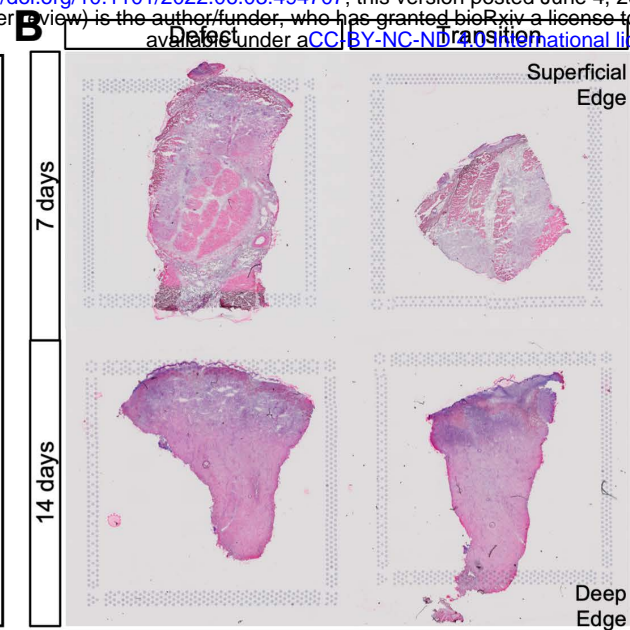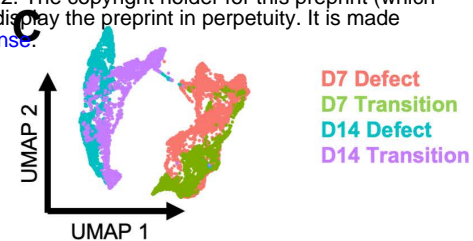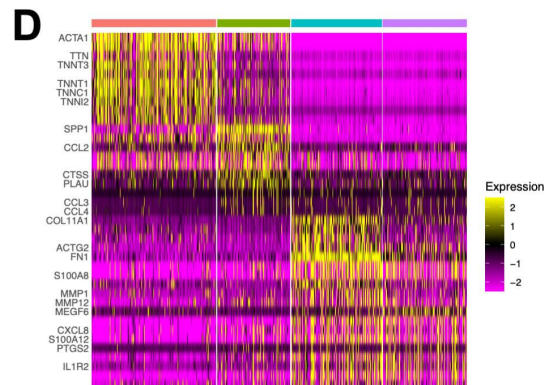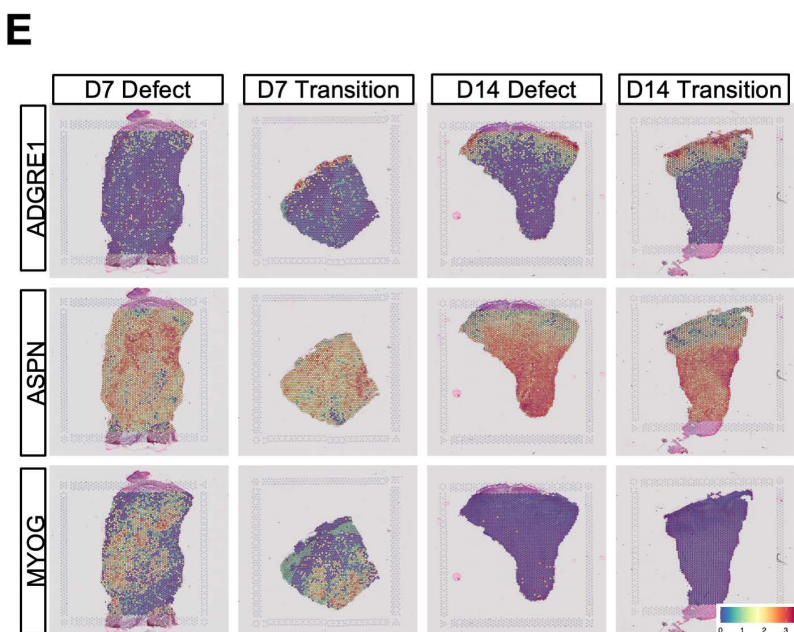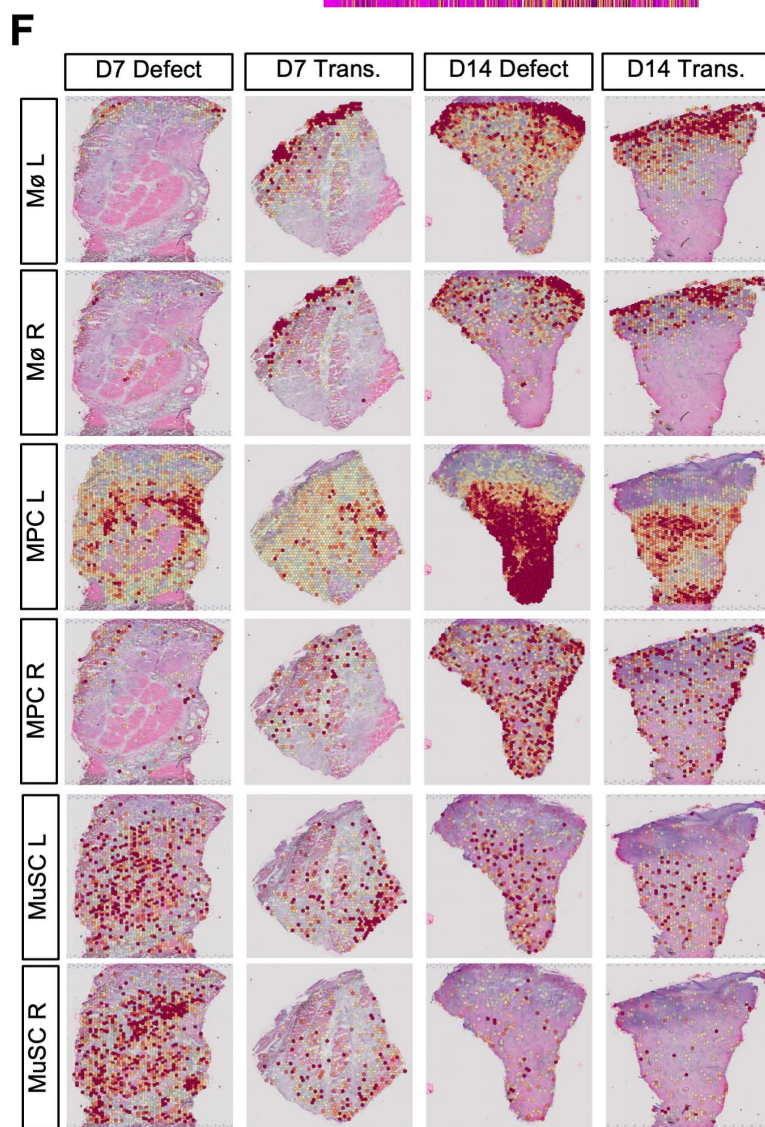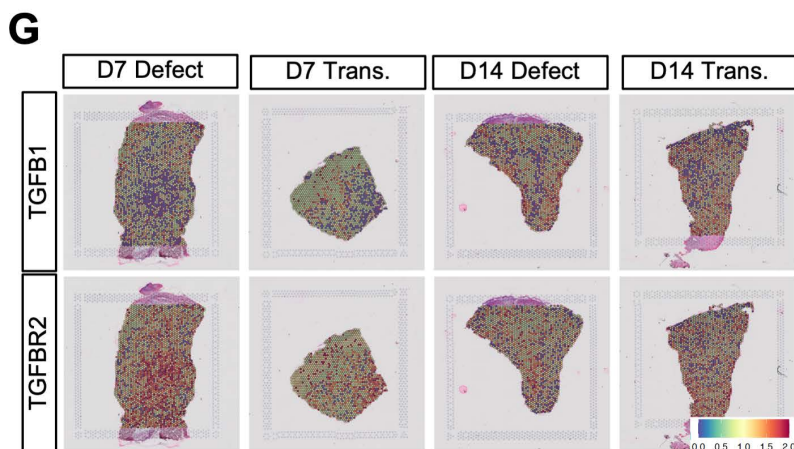





**A**

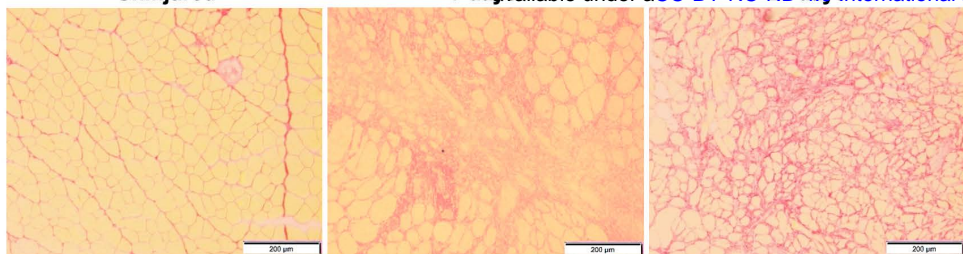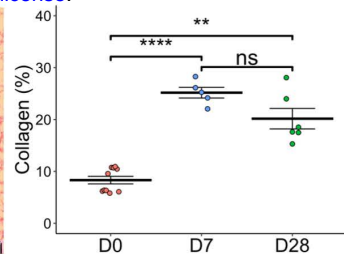

**B**

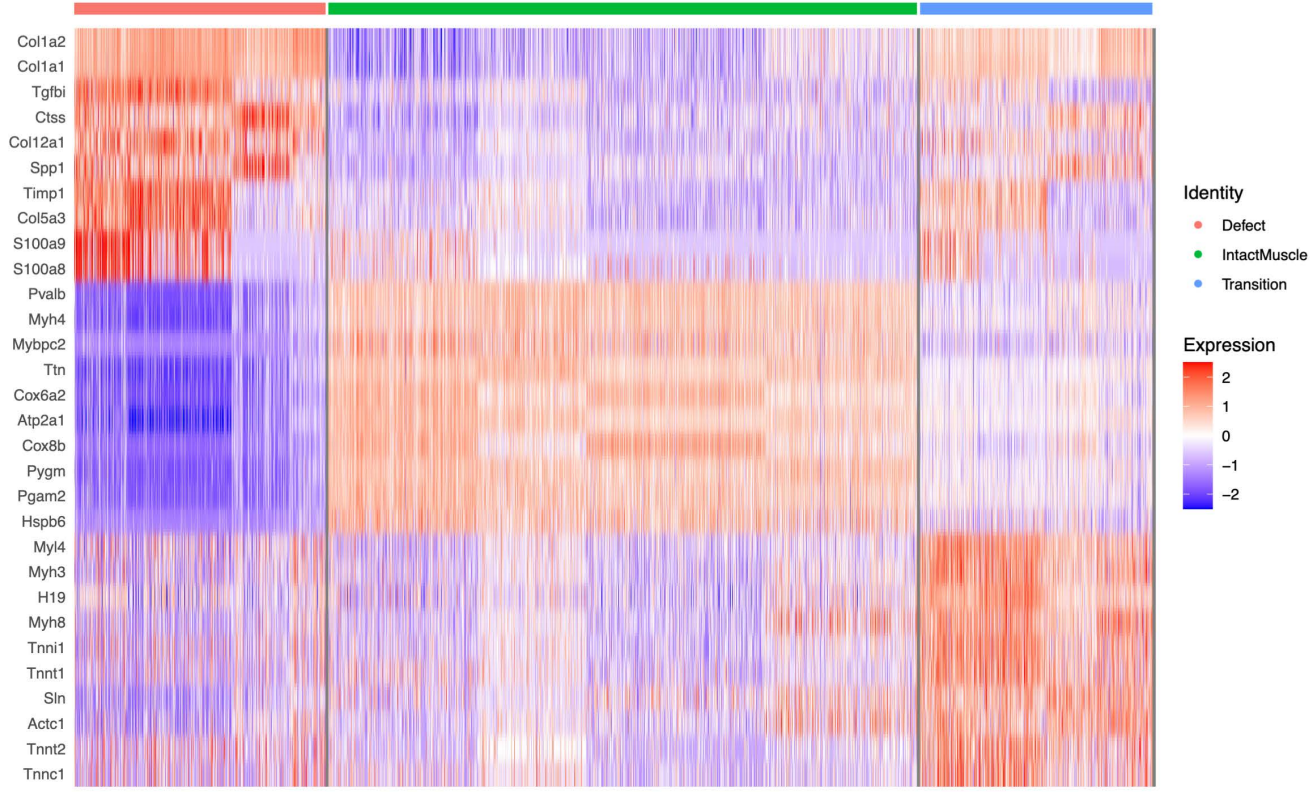

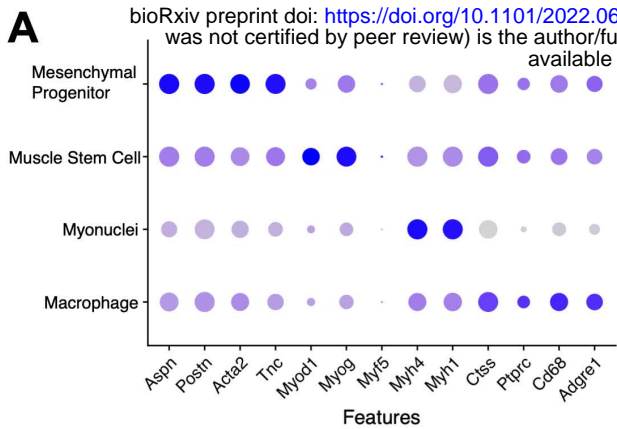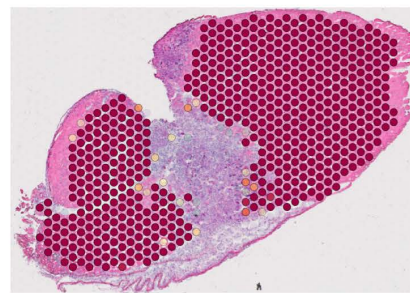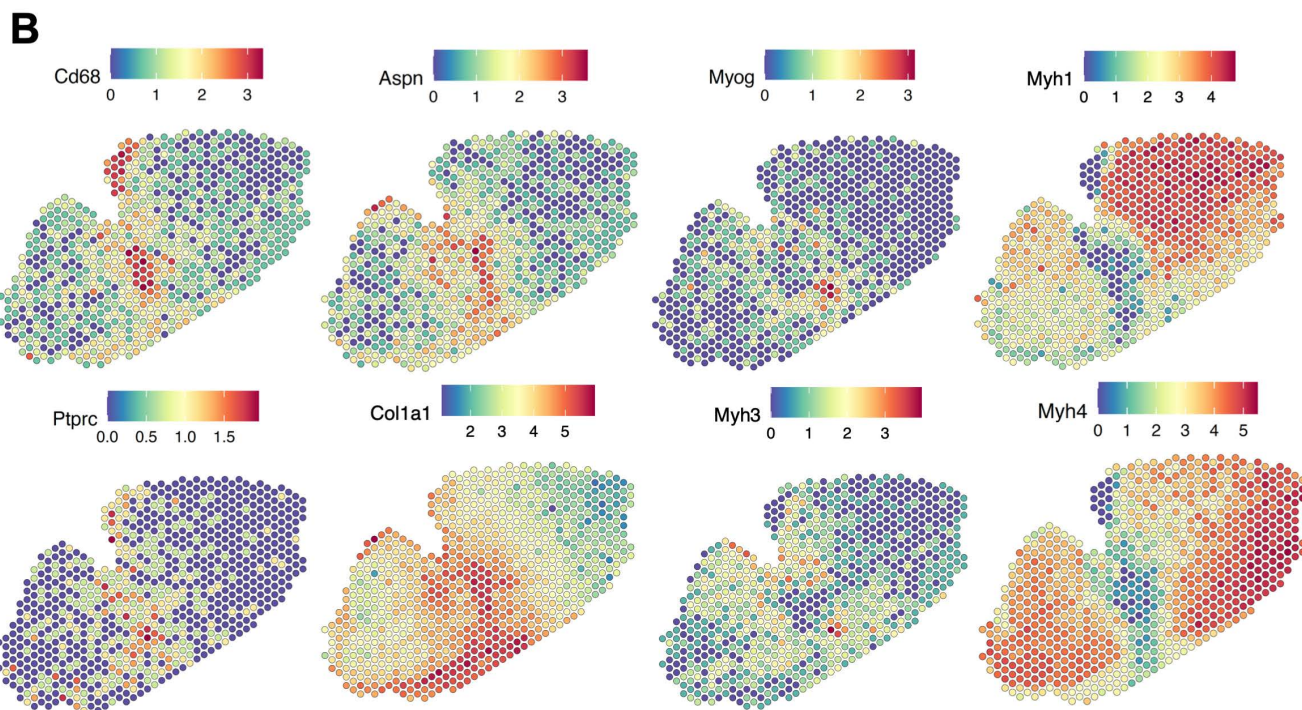

nCount\_Spatial  
10000 20000

nCount\_Spatial  
10000000000000000

nCount\_Spatial  
100002000030000

nCount\_Spatial  
10000200003000040000

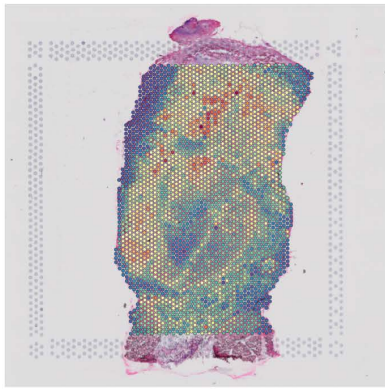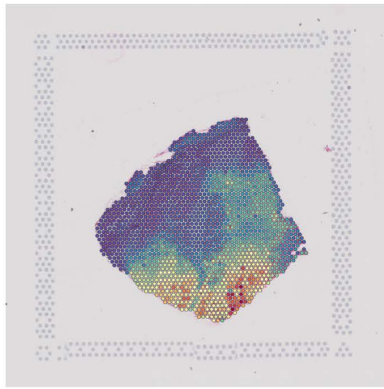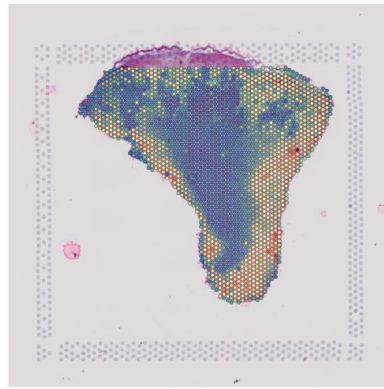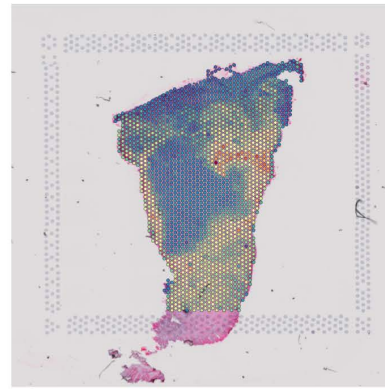

D7\_Defect

nFeature\_Spatial  
1000200030004000

D7\_transition

nFeature\_Spatial  
10002000300040005000

D14\_Defect

nFeature\_Spatial  
1000200030004000

D14\_transition

nFeature\_Spatial  
1000200030004000

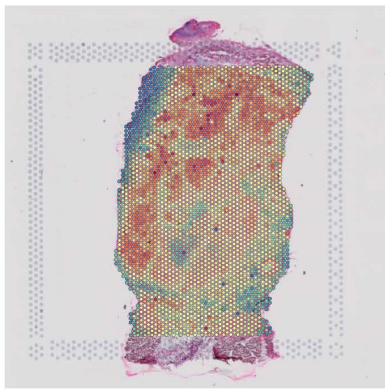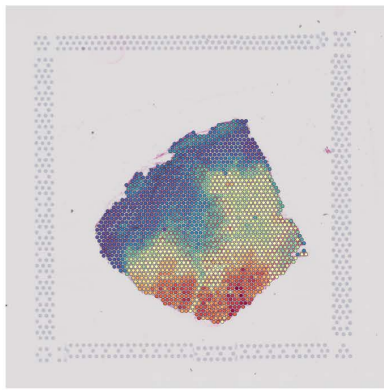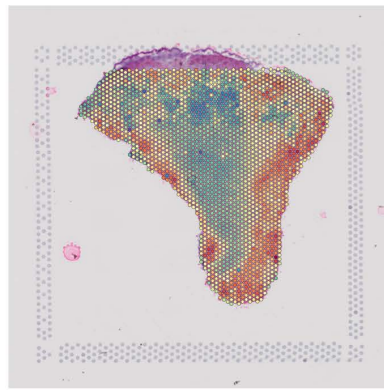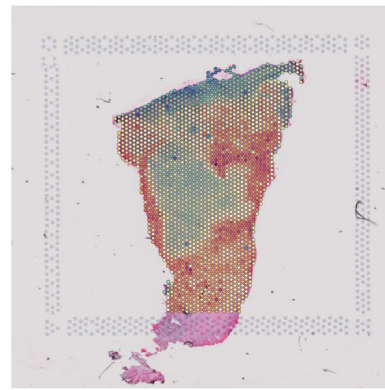

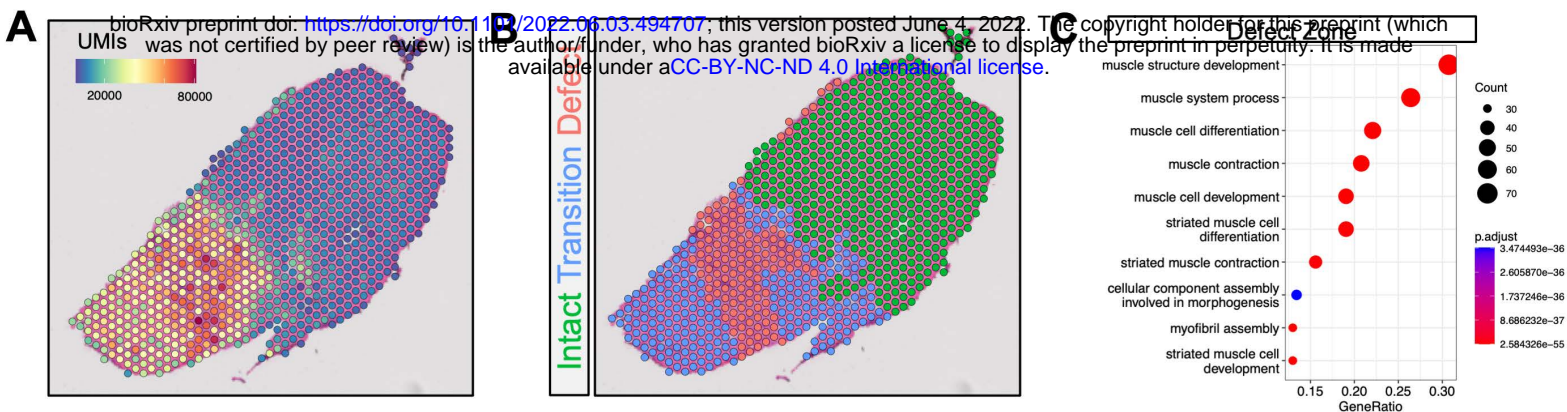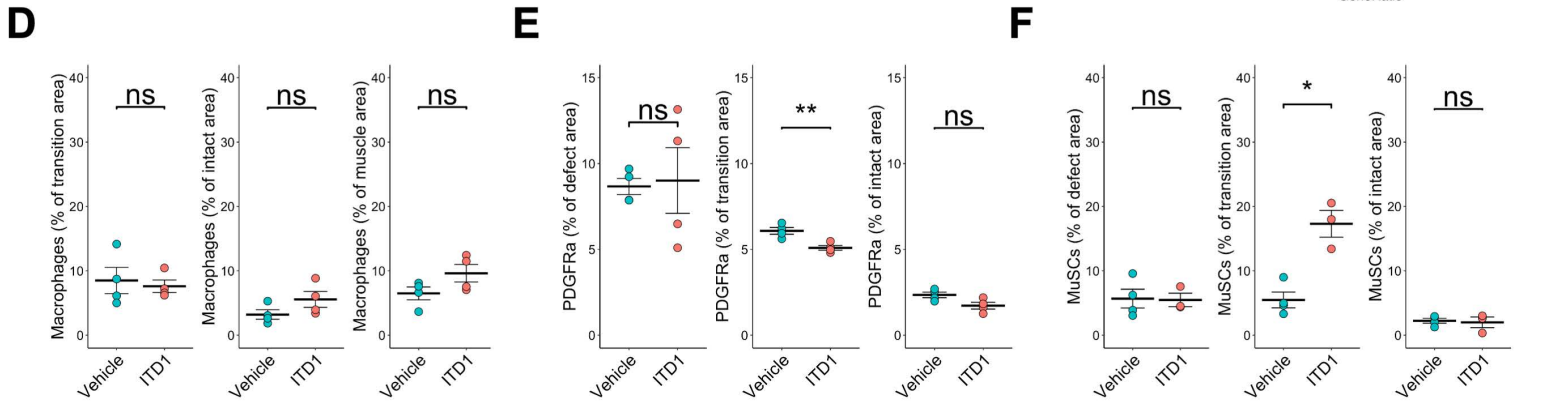

Source: https://www.biorxiv.org/content/biorxiv/early/2022/06/04/2022.06.03.494707.full.pdf
